# Supplementary material for: Host-microbiome metabolism of a plant toxin in bees
Source: eLife. 2022 Dec 6;11:e82595. doi: 10.7554/eLife.82595 (PMC9897726; doi:10.7554/eLife.82595)
Supplement: Figure 4—source data 2. [file elife-82595-fig4-data2.xlsx]

## Sheet: Figure 4 - source data 2
Figure 4 - source data 2
Differential protein expression analysis for amygdalin- and glucose-grown cultures of Bifidobacterium strain wkB204
Experiment: 8251
	Peak List Generator: unknown
		Version: unknown
		Charge States Calculated: unknown
		Deisotoped: unknown
		Textual Annotation: unknown
	Database Set: 1 Database
		Database Name: 8251_new_July2022_wkB204A1Sgenomencbiok.fasta; MAxquantcontaminants-042817.fasta; S_cerevisaie_canon_110221.fasta
			Version: unknown
			Taxonomy: All Entries
			Number of Proteins: 7882
		Does database contain common contaminants?: unknown
	Search Engine Set: 1 Search Engine
		Search Engine: Sequest
			Version: IseNode in Proteome Discoverer 2.2.0.388
			Samples: All Samples
			Fragment Tolerance: 0.60 Da (Monoisotopic)
			Parent Tolerance: 10.0 PPM (Monoisotopic)
			Fixed Modifications:
			Database: 8251_wkB204_genome.fasta; MAxquantcontaminants-042817.fasta; S_cerevisaie_canon_110221.fasta (unknown version, 7882 entries)
			Digestion Enzyme: Trypsin
			Max Missed Cleavages: 2
			Probability Model:
				8251_EDM_1: Peptide Prophet with Delta Mass Correction [+2 and below,+3,+4,+5,+6 and above]
				8251_EDM_2: Peptide Prophet with Delta Mass Correction [+2 and below,+3,+4,+5,+6 and above]
				8251_EDM_3: Peptide Prophet with Delta Mass Correction [+2 and below,+3,+4,+5,+6 and above]
				8251_EDM_4: Peptide Prophet with Delta Mass Correction [+2 and below,+3,+4,+5,+6 and above]
				8251_EDM_5: Peptide Prophet with Delta Mass Correction [+2 and below,+3,+4,+5,+6 and above]
				8251_EDM_6: Peptide Prophet with Delta Mass Correction [+2 and below,+3,+4,+5,+6 and above]
	Scaffold: Version: Scaffold_5.0.0
		Modification Metadata Set: 2334 modifications
			Source: C:\Program Files\Scaffold\parameters\unimod.xml
			Comment:
		Protein Grouping Strategy: Experiment-wide grouping with binary peptide-protein weights
		Peptide Thresholds: 95.0% minimum
		Protein Thresholds: 99.0% minimum and 2 peptides minimum
		Peptide FDR: 0.0% (Decoy)
		Protein FDR: 0.0% (Decoy)
		GO Annotation Source(s):
		Pathway Annotation Source(s):
		Alternate ID Source(s): FASTA:UniProt/Swiss-Prot Alt. Accession (UniProtKB)
												Quantitative Value (Normalized Total Spectra)	Quantitative Value (Normalized Total Spectra)	Quantitative Value (Normalized Total Spectra)	Quantitative Value (Normalized Total Spectra)	Quantitative Value (Normalized Total Spectra)	Quantitative Value (Normalized Total Spectra)
8251												Glucose	Glucose	Glucose	Toxin	Toxin	Toxin
#	Visible?	Starred?	Identified Proteins (432)	Accession Number	Alternate ID	Molecular Weight	Protein Grouping Ambiguity	T-Test (p-value): *(p < 0.02766)	Fold Change by Category	Quantitative Profile	Taxonomy	8251_01	8251_02	8251_03	8251_04	8251_05	8251_06
168	TRUE	Empty	Bifidobacterium asteroides strain wkB204, whole genome shotgun sequence	204_A_1_S_1_pilin_N-terminal_domain-containing_protein_CDS		71 kDa		0.44	1	[]	unknown	410.05	471.31	470.55	445.3	480.36	489.01
241	TRUE	Empty	Bifidobacterium asteroides strain wkB204, whole genome shotgun sequence	204_A_1_S_4_cell_wall-binding_repeat-containing_protein_CDS		72 kDa		0.0014	0.6	Glucose high, Toxin low	unknown	533.06	574.22	613.44	272.13	321.85	352.45
109	TRUE	Empty	Bifidobacterium asteroides strain wkB204, whole genome shotgun sequence	204_A_1_S_2_eno_CDS		47 kDa		< 0.00010	2	Glucose low, Toxin high	unknown	178.37	178.03	168.67	366.5	331.51	354.45
164	TRUE	Empty	Bifidobacterium asteroides strain wkB204, whole genome shotgun sequence	204_A_1_S_2_phosphoketolase_CDS		93 kDa		0.17	1.1	[]	unknown	159.92	163.62	164.37	185.08	167.21	166.68
133	TRUE	Empty	Bifidobacterium asteroides strain wkB204, whole genome shotgun sequence	204_A_1_S_2_tal_CDS		40 kDa		0.00029	1.4	Glucose low, Toxin high	unknown	116.86	128.63	122.47	176.84	172.04	182.75
174	TRUE	Empty	Bifidobacterium asteroides strain wkB204, whole genome shotgun sequence	204_A_1_S_1_Zn-dependent_alcohol_dehydrogenase_CDS		40 kDa		0.87	1	[]	unknown	162.99	157.45	143.96	160.35	147.88	152.63
122	TRUE	Empty	Bifidobacterium asteroides strain wkB204, whole genome shotgun sequence	204_A_1_S_3_inositol-3-phosphate_synthase_CDS		42 kDa		0.00042	1.7	Glucose low, Toxin high	unknown	102.51	114.23	110.65	197.91	183.64	176.73
128	TRUE	Empty	Bifidobacterium asteroides strain wkB204, whole genome shotgun sequence	204_A_1_S_2_tkt_CDS		76 kDa		0.00013	1.6	Glucose low, Toxin high	unknown	94.311	97.762	85.946	151.18	145.94	149.61
96	TRUE	Empty	Bifidobacterium asteroides strain wkB204, whole genome shotgun sequence	204_A_1_S_1_ABC_transporter_substrate-binding_protein_CDS_3		60 kDa	TRUE	0.00014	2.3	Glucose low, Toxin high	unknown	58.432	78.209	70.905	168.59	159.47	159.66
190	TRUE	Empty	Bifidobacterium asteroides strain wkB204, whole genome shotgun sequence	204_A_1_S_1_pflB_CDS		89 kDa		0.33	0.9	[]	unknown	97.387	140.98	133.22	113.62	111.15	99.408
156	TRUE	Empty	Bifidobacterium asteroides strain wkB204, whole genome shotgun sequence	204_A_1_S_2_glycoside_hydrolase_family_3_C-terminal_domain-containing_protein_CDS		?		0.06	1.2	[]	unknown	93.286	102.91	108.51	116.37	132.41	113.47
170	TRUE	Empty	Bifidobacterium asteroides strain wkB204, whole genome shotgun sequence	204_A_1_S_2_NAD-dependent_succinate-semialdehyde_dehydrogenase_CDS		50 kDa		0.77	1	[]	unknown	94.311	119.37	102.06	95.291	119.85	110.45
105	TRUE	Empty	Bifidobacterium asteroides strain wkB204, whole genome shotgun sequence	204_A_1_S_6_gdhA_CDS		49 kDa		0.0009	2.1	Glucose low, Toxin high	unknown	67.658	62.773	51.567	116.37	132.41	135.56
145	TRUE	Empty	Bifidobacterium asteroides strain wkB204, whole genome shotgun sequence	204_A_1_S_2_superoxide_dismutase_CDS		23 kDa		0.0044	1.3	Glucose low, Toxin high	unknown	68.683	74.093	69.831	98.956	91.819	87.359
74	TRUE	Empty	Bifidobacterium asteroides strain wkB204, whole genome shotgun sequence	204_A_1_S_6_C1_family_peptidase_CDS		52 kDa		< 0.00010	3.4	Glucose low, Toxin high	unknown	29.729	44.25	41.898	127.36	135.31	126.52
276	TRUE	Empty	Bifidobacterium asteroides strain wkB204, whole genome shotgun sequence	204_A_1_S_1_gap_CDS		38 kDa		0.00021	0.4	Glucose high, Toxin low	unknown	104.56	114.23	123.55	43.064	41.56	38.157
226	TRUE	Empty	Bifidobacterium asteroides strain wkB204, whole genome shotgun sequence	204_A_1_S_1_G5_domain-containing_protein_CDS		35 kDa		0.0015	0.6	Glucose high, Toxin low	unknown	114.81	101.88	103.13	62.306	72.488	66.272
248	TRUE	Empty	Bifidobacterium asteroides strain wkB204, whole genome shotgun sequence	204_A_1_S_6_spxB_CDS		64 kDa		< 0.00010	0.5	Glucose high, Toxin low	unknown	106.61	100.85	105.28	54.059	57.024	51.21
102	TRUE	Empty	Bifidobacterium asteroides strain wkB204, whole genome shotgun sequence	204_A_1_S_6_cysteine_ABC_transporter_substrate-binding_protein_CDS		32 kDa		< 0.00010	2.2	Glucose low, Toxin high	unknown	47.156	48.366	49.419	108.12	98.584	106.44
203	TRUE	Empty	Bifidobacterium asteroides strain wkB204, whole genome shotgun sequence	204_A_1_S_>_hypothetical_protein_CDS_9		59 kDa		0.0039	0.8	Glucose high, Toxin low	unknown	79.96	89.529	91.317	65.055	66.689	64.264
101	TRUE	Empty	Bifidobacterium asteroides strain wkB204, whole genome shotgun sequence	204_A_1_S_8_DNA_starvation/stationary_phase_protection_protein_CDS		18 kDa		< 0.00010	2.2	Glucose low, Toxin high	unknown	44.08	46.308	47.27	99.872	97.618	103.42
185	TRUE	Empty	SWISS-PROT:P00761|TRYP_PIG Trypsin - Sus scrofa (Pig).	P00761		24 kDa		0.35	0.9	[]	unknown	51.256	43.221	54.79	43.064	47.359	47.194
71	TRUE	Empty	Bifidobacterium asteroides strain wkB204, whole genome shotgun sequence	204_A_1_S_2_glnA_CDS		53 kDa		< 0.00010	4	Glucose low, Toxin high	unknown	25.628	24.698	31.155	107.2	112.12	105.43
175	TRUE	Empty	Bifidobacterium asteroides strain wkB204, whole genome shotgun sequence	204_A_1_S_1_InlB_B-repeat-containing_protein_CDS		114 kDa	TRUE	0.91	1	[]	unknown	54.332	76.151	78.425	63.222	70.555	72.297
247	TRUE	Empty	Bifidobacterium asteroides strain wkB204, whole genome shotgun sequence	204_A_1_S_2_groL_CDS		57 kDa		< 0.00010	0.5	Glucose high, Toxin low	unknown	92.261	88.5	92.391	48.562	44.46	49.202
192	TRUE	Empty	Bifidobacterium asteroides strain wkB204, whole genome shotgun sequence	204_A_1_S_2_InlB_B-repeat-containing_protein_CDS_2		113 kDa	TRUE	0.12	0.9	[]	unknown	79.96	71.006	65.533	55.892	64.756	65.268
204	TRUE	Empty	Bifidobacterium asteroides strain wkB204, whole genome shotgun sequence	204_A_1_S_2_phosphoglycerate_kinase_CDS		42 kDa		0.018	0.7	Glucose high, Toxin low	unknown	71.759	74.093	82.723	54.059	52.192	64.264
264	TRUE	Empty	SWISS-PROT:P04264 Tax_Id=9606 Gene_Symbol=KRT1 Keratin, type II cytoskeletal 1	P04264		66 kDa	TRUE	0.098	0.4	[]	unknown	140.44	71.006	66.608	43.064	46.393	32.132
280	TRUE	Empty	SWISS-PROT:P35527 Tax_Id=9606 Gene_Symbol=KRT9 Keratin, type I cytoskeletal 9	P35527		62 kDa	TRUE	0.18	0.3	[]	unknown	161.97	61.744	45.121	34.818	42.526	9.0371
120	TRUE	Empty	Bifidobacterium asteroides strain wkB204, whole genome shotgun sequence	204_A_1_S_1_leuS_CDS		111 kDa		0.0029	1.7	Glucose low, Toxin high	unknown	42.03	42.192	50.493	72.385	85.053	73.301
231	TRUE	Empty	Bifidobacterium asteroides strain wkB204, whole genome shotgun sequence	204_A_1_S_1_NAD-dependent_malic_enzyme_CDS		59 kDa		0.0037	0.6	Glucose high, Toxin low	unknown	69.708	84.384	85.946	49.478	45.426	48.198
66	TRUE	Empty	Bifidobacterium asteroides strain wkB204, whole genome shotgun sequence	204_A_1_S_1_extracellular_solute-binding_protein_CDS_2		47 kDa		0.00025	4.4	Glucose low, Toxin high	unknown	24.603	21.611	18.263	98.04	83.12	101.42
87	TRUE	Empty	Bifidobacterium asteroides strain wkB204, whole genome shotgun sequence	204_A_1_S_2_(S)-acetoin_forming_diacetyl_reductase_CDS		27 kDa		0.00058	2.7	Glucose low, Toxin high	unknown	31.779	34.988	36.527	85.212	102.45	86.354
125	TRUE	Empty	Bifidobacterium asteroides strain wkB204, whole genome shotgun sequence	204_A_1_S_2_proline--tRNA_ligase_CDS		67 kDa		0.0072	1.6	Glucose low, Toxin high	unknown	35.879	49.395	41.898	65.055	75.388	65.268
113	TRUE	Empty	Bifidobacterium asteroides strain wkB204, whole genome shotgun sequence	204_A_1_S_4_aldo/keto_reductase_CDS		35 kDa		0.00015	1.9	Glucose low, Toxin high	unknown	39.98	40.134	39.75	72.385	81.187	75.309
239	TRUE	Empty	SWISS-PROT:P13645 Tax_Id=9606 Gene_Symbol=KRT10 Keratin, type I cytoskeletal 10	P13645		60 kDa	TRUE	0.18	0.6	[]	unknown	101.49	57.628	44.047	44.897	43.493	26.107
161	TRUE	Empty	Bifidobacterium asteroides strain wkB204, whole genome shotgun sequence	204_A_1_S_1_hypothetical_protein_CDS_31		32 kDa		0.22	1.1	[]	unknown	48.181	53.512	50.493	50.394	56.058	63.26
189	TRUE	Empty	Bifidobacterium asteroides strain wkB204, whole genome shotgun sequence	204_A_1_S_1_InlB_B-repeat-containing_protein_CDS_2		116 kDa	TRUE	0.093	0.9	[]	unknown	56.382	56.599	61.236	44.897	54.125	53.218
1	TRUE	Empty	Bifidobacterium asteroides strain wkB204, whole genome shotgun sequence	204_A_1_S_1_beta-galactosidase_CDS		75 kDa		< 0.00010	INF	Glucose low, Toxin high	unknown	0	0	0	100.79	107.28	108.45
103	TRUE	Empty	Bifidobacterium asteroides strain wkB204, whole genome shotgun sequence	204_A_1_S_2_metE_CDS		88 kDa		0.00032	2.1	Glucose low, Toxin high	unknown	25.628	31.901	34.378	62.306	65.723	67.276
59	TRUE	Empty	Bifidobacterium asteroides strain wkB204, whole genome shotgun sequence	204_A_1_S_6_groES_CDS		10 kDa		< 0.00010	5.8	Glucose low, Toxin high	unknown	20.502	12.349	12.892	87.045	94.718	85.35
205	TRUE	Empty	Bifidobacterium asteroides strain wkB204, whole genome shotgun sequence	204_A_1_S_1_InlB_B-repeat-containing_protein_CDS_3		125 kDa		0.081	0.7	[]	unknown	46.131	63.802	55.865	47.646	38.66	37.153
259	TRUE	Empty	Bifidobacterium asteroides strain wkB204, whole genome shotgun sequence	204_A_1_S_1_amidohydrolase_CDS		52 kDa		< 0.00010	0.5	Glucose high, Toxin low	unknown	67.658	68.948	68.756	31.153	28.995	36.148
180	TRUE	Empty	Bifidobacterium asteroides strain wkB204, whole genome shotgun sequence	204_A_1_S_1_pepN_CDS		98 kDa		0.81	1	[]	unknown	32.804	54.541	38.675	43.981	38.66	38.157
79	TRUE	Empty	Bifidobacterium asteroides strain wkB204, whole genome shotgun sequence	204_A_1_S_5_prolyl_oligopeptidase_family_serine_peptidase_CDS		88 kDa		0.00012	3	Glucose low, Toxin high	unknown	21.528	26.756	17.189	66.887	63.79	65.268
52	TRUE	Empty	Bifidobacterium asteroides strain wkB204, whole genome shotgun sequence	204_A_1_S_1_glycosyl_hydrolase_CDS_2		50 kDa		< 0.00010	16	Glucose low, Toxin high	unknown	3.0754	5.1454	7.5202	79.715	88.919	86.354
114	TRUE	Empty	Bifidobacterium asteroides strain wkB204, whole genome shotgun sequence	204_A_1_S_1_L-lactate_dehydrogenase_CDS		34 kDa		0.0017	1.9	Glucose low, Toxin high	unknown	37.93	25.727	30.081	58.641	57.991	62.256
194	TRUE	Empty	Bifidobacterium asteroides strain wkB204, whole genome shotgun sequence	204_A_1_S_1_pgi_CDS		63 kDa		0.43	0.9	[]	unknown	32.804	55.57	52.642	38.483	46.393	35.144
217	TRUE	Empty	SWISS-PROT:P35908 Tax_Id=9606 Gene_Symbol=KRT2 Keratin, type II cytoskeletal 2 epidermal	P35908		66 kDa	TRUE	0.21	0.7	[]	unknown	60.482	34.988	35.453	36.65	29.962	21.087
62	TRUE	Empty	Bifidobacterium asteroides strain wkB204, whole genome shotgun sequence	204_A_1_S_3_aspartate-semialdehyde_dehydrogenase_CDS		39 kDa		< 0.00010	4.6	Glucose low, Toxin high	unknown	14.352	15.436	16.115	68.72	70.555	73.301
324	TRUE	Empty	Bifidobacterium asteroides strain wkB204, whole genome shotgun sequence	204_A_1_S_6_DUF1729_domain-containing_protein_CDS		336 kDa		0.0012	0.05	Glucose high, Toxin low	unknown	57.407	81.297	82.723	2.7488	7.7321	0
302	TRUE	Empty	Bifidobacterium asteroides strain wkB204, whole genome shotgun sequence	204_A_1_S_4_dnaK_CDS		67 kDa		0.00054	0.2	Glucose high, Toxin low	unknown	68.683	59.686	75.202	19.241	9.6651	11.045
182	TRUE	Empty	Bifidobacterium asteroides strain wkB204, whole genome shotgun sequence	204_A_1_S_2_InlB_B-repeat-containing_protein_CDS		80 kDa	TRUE	0.31	0.9	[]	unknown	36.904	41.163	36.527	33.902	35.761	38.157
167	TRUE	Empty	Bifidobacterium asteroides strain wkB204, whole genome shotgun sequence	204_A_1_S_3_InlB_B-repeat-containing_protein_CDS_4		155 kDa	TRUE	0.64	1	[]	unknown	33.829	44.25	42.973	40.315	46.393	40.165
65	TRUE	Empty	Bifidobacterium asteroides strain wkB204, whole genome shotgun sequence	204_A_1_S_4_VCBS_domain-containing_protein_CDS		191 kDa		0.0014	4.4	Glucose low, Toxin high	unknown	9.2261	15.436	17.189	52.227	71.522	61.251
110	TRUE	Empty	Bifidobacterium asteroides strain wkB204, whole genome shotgun sequence	204_A_1_S_5_trypsin-like_peptidase_domain-containing_protein_CDS		63 kDa		0.00034	2	Glucose low, Toxin high	unknown	30.754	24.698	24.709	54.059	51.225	51.21
136	TRUE	Empty	Bifidobacterium asteroides strain wkB204, whole genome shotgun sequence	204_A_1_S_1_ABC_transporter_substrate-binding_protein_CDS_4		60 kDa	TRUE	0.018	1.4	Glucose low, Toxin high	unknown	26.653	30.872	34.378	47.646	43.493	39.161
249	TRUE	Empty	Bifidobacterium asteroides strain wkB204, whole genome shotgun sequence	204_A_1_S_2_acetate_kinase_CDS		44 kDa		0.00079	0.5	Glucose high, Toxin low	unknown	50.231	52.483	50.493	31.153	22.23	25.103
94	TRUE	Empty	Bifidobacterium asteroides strain wkB204, whole genome shotgun sequence	204_A_1_S_2_ABC_transporter_substrate-binding_protein_CDS		32 kDa		0.00012	2.4	Glucose low, Toxin high	unknown	22.553	25.727	21.486	57.724	52.192	57.235
130	TRUE	Empty	Bifidobacterium asteroides strain wkB204, whole genome shotgun sequence	204_A_1_S_2_O-acetylhomoserine_aminocarboxypropyltransferase/cysteine_synthase_CDS		48 kDa		0.013	1.6	Glucose low, Toxin high	unknown	22.553	33.959	34.378	48.562	45.426	49.202
121	TRUE	Empty	Bifidobacterium asteroides strain wkB204, whole genome shotgun sequence	204_A_1_S_6_hypothetical_protein_CDS_12		36 kDa		0.00086	1.7	Glucose low, Toxin high	unknown	23.578	25.727	24.709	45.813	39.627	41.169
106	TRUE	Empty	Bifidobacterium asteroides strain wkB204, whole genome shotgun sequence	204_A_1_S_3_formate--tetrahydrofolate_ligase_CDS		55 kDa		0.0012	2.1	Glucose low, Toxin high	unknown	18.452	26.756	20.412	48.562	46.393	43.177
181	TRUE	Empty	Bifidobacterium asteroides strain wkB204, whole genome shotgun sequence	204_A_1_S_6_NlpC/P60_family_protein_CDS		25 kDa		0.24	0.9	[]	unknown	35.879	40.134	38.675	37.567	34.794	36.148
191	TRUE	Empty	Bifidobacterium asteroides strain wkB204, whole genome shotgun sequence	204_A_1_S_1_hypothetical_protein_CDS_30		29 kDa		0.054	0.9	[]	unknown	36.904	40.134	38.675	36.65	30.928	32.132
216	TRUE	Empty	Bifidobacterium asteroides strain wkB204, whole genome shotgun sequence	204_A_1_S_2_tuf_CDS		44 kDa		0.017	0.7	Glucose high, Toxin low	unknown	37.93	41.163	41.898	21.074	31.895	28.115
296	TRUE	Empty	Bifidobacterium asteroides strain wkB204, whole genome shotgun sequence	204_A_1_S_4_gndA_CDS		53 kDa		0.00061	0.2	Glucose high, Toxin low	unknown	48.181	60.715	50.493	14.66	12.565	9.0371
210	TRUE	Empty	Bifidobacterium asteroides strain wkB204, whole genome shotgun sequence	204_A_1_S_4_hypothetical_protein_CDS_7		46 kDa	TRUE	0.019	0.7	Glucose high, Toxin low	unknown	36.904	39.105	37.601	24.739	32.861	25.103
2	TRUE	Empty	Bifidobacterium asteroides strain wkB204, whole genome shotgun sequence	204_A_1_S_1_glycoside_hydrolase_family_3_C-terminal_domain-containing_protein_CDS		?		< 0.00010	INF	Glucose low, Toxin high	unknown	0	0	0	65.971	62.823	62.256
158	TRUE	Empty	Bifidobacterium asteroides strain wkB204, whole genome shotgun sequence	204_A_1_S_1_araA_CDS		56 kDa		0.016	1.1	Glucose low, Toxin high	unknown	29.729	26.756	27.932	32.985	32.861	31.128
75	TRUE	Empty	Bifidobacterium asteroides strain wkB204, whole genome shotgun sequence	204_A_1_S_1_hisG_CDS		31 kDa		< 0.00010	3.2	Glucose low, Toxin high	unknown	11.276	11.32	12.892	38.483	35.761	39.161
90	TRUE	Empty	Bifidobacterium asteroides strain wkB204, whole genome shotgun sequence	204_A_1_S_1_HAD-IIA_family_hydrolase_CDS		29 kDa		0.0024	2.5	Glucose low, Toxin high	unknown	24.603	14.407	15.04	41.232	49.292	46.19
267	TRUE	Empty	Bifidobacterium asteroides strain wkB204, whole genome shotgun sequence	204_A_1_S_1_aminopeptidase_P_family_protein_CDS		58 kDa		0.0011	0.4	Glucose high, Toxin low	unknown	46.131	39.105	38.675	20.158	16.431	15.062
162	TRUE	Empty	Bifidobacterium asteroides strain wkB204, whole genome shotgun sequence	204_A_1_S_4_ABC_transporter_substrate-binding_protein_CDS		40 kDa		0.37	1.1	[]	unknown	20.502	28.814	25.784	29.32	25.129	29.12
261	TRUE	Empty	Bifidobacterium asteroides strain wkB204, whole genome shotgun sequence	204_A_1_S_1_aldo/keto_reductase_CDS_3		34 kDa		0.0017	0.5	Glucose high, Toxin low	unknown	41.005	34.988	40.824	20.158	13.531	19.078
263	TRUE	Empty	Bifidobacterium asteroides strain wkB204, whole genome shotgun sequence	204_A_1_S_8_FAD-dependent_oxidoreductase_CDS		63 kDa		0.003	0.4	Glucose high, Toxin low	unknown	39.98	49.395	37.601	20.158	17.397	18.074
306	TRUE	Empty	Bifidobacterium asteroides strain wkB204, whole genome shotgun sequence	204_A_1_S_>_hypothetical_protein_CDS_8		46 kDa	TRUE	0.00021	0.2	Glucose high, Toxin low	unknown	43.055	47.337	51.567	6.4138	11.598	6.0247
117	TRUE	Empty	Bifidobacterium asteroides strain wkB204, whole genome shotgun sequence	204_A_1_S_1_dapA_CDS		32 kDa		< 0.00010	1.8	Glucose low, Toxin high	unknown	18.452	17.494	17.189	32.985	30.928	32.132
119	TRUE	Empty	Bifidobacterium asteroides strain wkB204, whole genome shotgun sequence	204_A_1_S_6_ABC_transporter_substrate-binding_protein_CDS		30 kDa		< 0.00010	1.8	Glucose low, Toxin high	unknown	19.477	21.611	20.412	36.65	35.761	37.153
177	TRUE	Empty	Bifidobacterium asteroides strain wkB204, whole genome shotgun sequence	204_A_1_S_1_galT_CDS		49 kDa		0.79	1	[]	unknown	24.603	28.814	26.858	29.32	25.129	24.099
304	TRUE	Empty	SWISS-PROT:P02538 Tax_Id=9606 Gene_Symbol=KRT6A Keratin, type II cytoskeletal 6A	P02538		60 kDa	TRUE	0.08	0.2	[]	unknown	54.332	41.163	12.892	10.079	9.6651	0
76	TRUE	Empty	Bifidobacterium asteroides strain wkB204, whole genome shotgun sequence	204_A_1_S_1_rpe_CDS		24 kDa		0.0011	3	Glucose low, Toxin high	unknown	14.352	13.378	7.5202	34.818	32.861	39.161
293	TRUE	Empty	SWISS-PROT:P13647 Tax_Id=9606 Gene_Symbol=KRT5 Keratin, type II cytoskeletal 5	P13647		62 kDa	TRUE	0.092	0.3	[]	unknown	52.281	31.901	16.115	12.828	12.565	0
329	TRUE	Empty	Bifidobacterium asteroides strain wkB204, whole genome shotgun sequence	204_A_1_S_2_pheT_CDS		95 kDa		< 0.00010	0	Glucose high, Toxin low	unknown	53.306	61.744	55.865	0	0	0
330	TRUE	Empty	SWISS-PROT:P04259 Tax_Id=9606 Gene_Symbol=KRT6B Keratin, type II cytoskeletal 6B	P04259		60 kDa	TRUE	0.37	0	[]	unknown	51.256	0	0	0	0	0
84	TRUE	Empty	Bifidobacterium asteroides strain wkB204, whole genome shotgun sequence	204_A_1_S_3_PLP-dependent_aminotransferase_family_protein_CDS		48 kDa		0.0012	2.8	Glucose low, Toxin high	unknown	10.251	16.465	13.966	39.399	40.593	33.136
152	TRUE	Empty	Bifidobacterium asteroides strain wkB204, whole genome shotgun sequence	204_A_1_S_1_ATP-dependent_Clp_protease_proteolytic_subunit_CDS		21 kDa		0.32	1.2	[]	unknown	20.502	26.756	23.635	34.818	20.297	32.132
115	TRUE	Empty	Bifidobacterium asteroides strain wkB204, whole genome shotgun sequence	204_A_1_S_6_OsmC_family_protein_CDS		15 kDa		0.0016	1.9	Glucose low, Toxin high	unknown	17.427	22.64	17.189	33.902	38.66	36.148
195	TRUE	Empty	Bifidobacterium asteroides strain wkB204, whole genome shotgun sequence	204_A_1_S_2_S-ribosylhomocysteine_lyase_CDS		18 kDa		0.061	0.8	[]	unknown	26.653	25.727	31.155	22.907	23.196	24.099
208	TRUE	Empty	Bifidobacterium asteroides strain wkB204, whole genome shotgun sequence	204_A_1_S_6_phosphoglyceromutase_CDS		28 kDa		0.18	0.7	[]	unknown	22.553	27.785	34.378	17.409	17.397	27.111
297	TRUE	Empty	Bifidobacterium asteroides strain wkB204, whole genome shotgun sequence	204_A_1_S_2_peptidase_M13_CDS		78 kDa		< 0.00010	0.2	Glucose high, Toxin low	unknown	41.005	43.221	38.675	8.2463	8.6986	10.041
196	TRUE	Empty	Bifidobacterium asteroides strain wkB204, whole genome shotgun sequence	204_A_1_S_2_dipeptidase_CDS		49 kDa		0.32	0.8	[]	unknown	23.578	23.669	25.784	18.325	15.464	27.111
235	TRUE	Empty	Bifidobacterium asteroides strain wkB204, whole genome shotgun sequence	204_A_1_S_2_pta_CDS		59 kDa		0.04	0.6	[]	unknown	24.603	30.872	37.601	21.074	19.33	14.058
159	TRUE	Empty	Bifidobacterium asteroides strain wkB204, whole genome shotgun sequence	204_A_1_S_4_SDR_family_oxidoreductase_CDS		26 kDa		0.07	1.1	[]	unknown	23.578	24.698	24.709	29.32	25.129	28.115
243	TRUE	Empty	Bifidobacterium asteroides strain wkB204, whole genome shotgun sequence	204_A_1_S_1_DivIVA_domain-containing_protein_CDS		48 kDa		0.0057	0.5	Glucose high, Toxin low	unknown	32.804	32.93	26.858	14.66	15.464	20.082
232	TRUE	Empty	Bifidobacterium asteroides strain wkB204, whole genome shotgun sequence	204_A_1_S_4_nucleotide_sugar_dehydrogenase_CDS		45 kDa		0.023	0.6	Glucose high, Toxin low	unknown	24.603	23.669	31.155	16.493	18.364	12.049
77	TRUE	Empty	Bifidobacterium asteroides strain wkB204, whole genome shotgun sequence	204_A_1_S_4_D-alanine--D-alanine_ligase_CDS		41 kDa		< 0.00010	3	Glucose low, Toxin high	unknown	12.301	11.32	11.818	33.902	34.794	38.157
139	TRUE	Empty	Bifidobacterium asteroides strain wkB204, whole genome shotgun sequence	204_A_1_S_6_FHA_domain-containing_protein_CDS		58 kDa		0.098	1.3	[]	unknown	21.528	17.494	23.635	32.985	23.196	28.115
95	TRUE	Empty	Bifidobacterium asteroides strain wkB204, whole genome shotgun sequence	204_A_1_S_1_xylA_CDS		51 kDa		0.00035	2.4	Glucose low, Toxin high	unknown	12.301	13.378	9.6689	27.488	27.062	30.124
234	TRUE	Empty	Bifidobacterium asteroides strain wkB204, whole genome shotgun sequence	204_A_1_S_8_redoxin_domain-containing_protein_CDS		21 kDa		0.00015	0.6	Glucose high, Toxin low	unknown	25.628	26.756	27.932	16.493	15.464	15.062
323	TRUE	Empty	Bifidobacterium asteroides strain wkB204, whole genome shotgun sequence	204_A_1_S_3_gatB_CDS		55 kDa		< 0.00010	0.05	Glucose high, Toxin low	unknown	37.93	36.018	35.453	5.4976	0	0
143	TRUE	Empty	Bifidobacterium asteroides strain wkB204, whole genome shotgun sequence	204_A_1_S_1_aldose_1-epimerase_family_protein_CDS		36 kDa		0.077	1.3	[]	unknown	21.528	19.552	18.263	31.153	23.196	24.099
82	TRUE	Empty	Bifidobacterium asteroides strain wkB204, whole genome shotgun sequence	204_A_1_S_4_NAD(P)-dependent_glycerol-3-phosphate_dehydrogenase_CDS		35 kDa		< 0.00010	2.8	Glucose low, Toxin high	unknown	11.276	10.291	10.743	29.32	29.962	32.132
294	TRUE	Empty	Bifidobacterium asteroides strain wkB204, whole genome shotgun sequence	204_A_1_S_>_hypothetical_protein_CDS_4		18 kDa		0.21	0.2	[]	unknown	34.854	0	38.675	7.3301	7.7321	3.0124
311	TRUE	Empty	Bifidobacterium asteroides strain wkB204, whole genome shotgun sequence	204_A_1_S_2_CHAP_domain-containing_protein_CDS		49 kDa		0.00024	0.2	Glucose high, Toxin low	unknown	33.829	42.192	38.675	6.4138	3.866	7.0289
188	TRUE	Empty	Bifidobacterium asteroides strain wkB204, whole genome shotgun sequence	204_A_1_S_1_ABC_transporter_substrate-binding_protein_CDS_2		59 kDa	TRUE	0.49	0.9	[]	unknown	17.427	24.698	21.486	21.074	14.498	21.087
272	TRUE	Empty	Bifidobacterium asteroides strain wkB204, whole genome shotgun sequence	204_A_1_S_2_rpsA_CDS		56 kDa		0.016	0.4	Glucose high, Toxin low	unknown	22.553	25.727	36.527	12.828	9.6651	10.041
289	TRUE	Empty	Bifidobacterium asteroides strain wkB204, whole genome shotgun sequence	204_A_1_S_1_NAD+_synthase_CDS		61 kDa		0.00024	0.3	Glucose high, Toxin low	unknown	27.678	24.698	29.007	9.1626	7.7321	6.0247
278	TRUE	Empty	Bifidobacterium asteroides strain wkB204, whole genome shotgun sequence	204_A_1_S_6_serS_CDS		48 kDa		0.00016	0.3	Glucose high, Toxin low	unknown	26.653	25.727	25.784	6.4138	10.632	9.0371
140	TRUE	Empty	Bifidobacterium asteroides strain wkB204, whole genome shotgun sequence	204_A_1_S_5_AGE_family_epimerase/isomerase_CDS		48 kDa		0.057	1.3	[]	unknown	15.377	20.581	13.966	23.823	22.23	21.087
206	TRUE	Empty	Bifidobacterium asteroides strain wkB204, whole genome shotgun sequence	204_A_1_S_4_glucose-6-phosphate_dehydrogenase_assembly_protein_OpcA_CDS		37 kDa		0.12	0.7	[]	unknown	22.553	23.669	18.263	14.66	20.297	13.054
60	TRUE	Empty	Bifidobacterium asteroides strain wkB204, whole genome shotgun sequence	204_A_1_S_1_zinc-dependent_metalloprotease_CDS		59 kDa		0.0023	5.2	Glucose low, Toxin high	unknown	7.1759	5.1454	6.4459	26.572	30.928	39.161
134	TRUE	Empty	Bifidobacterium asteroides strain wkB204, whole genome shotgun sequence	204_A_1_S_1_frr_CDS		21 kDa		0.1	1.4	[]	unknown	16.402	12.349	8.5946	18.325	15.464	20.082
141	TRUE	Empty	Bifidobacterium asteroides strain wkB204, whole genome shotgun sequence	204_A_1_S_6_FKBP-type_peptidyl-prolyl_cis-trans_isomerase_CDS		33 kDa		0.12	1.3	[]	unknown	15.377	12.349	16.115	15.576	23.196	20.082
285	TRUE	Empty	Bifidobacterium asteroides strain wkB204, whole genome shotgun sequence	204_A_1_S_6_CHAP_domain-containing_protein_CDS		32 kDa		0.0034	0.3	Glucose high, Toxin low	unknown	23.578	31.901	32.23	10.079	5.7991	11.045
244	TRUE	Empty	Bifidobacterium asteroides strain wkB204, whole genome shotgun sequence	204_A_1_S_2_NAD(P)_transhydrogenase_subunit_alpha_CDS_2		41 kDa		0.00017	0.5	Glucose high, Toxin low	unknown	23.578	25.727	25.784	13.744	12.565	14.058
80	TRUE	Empty	Bifidobacterium asteroides strain wkB204, whole genome shotgun sequence	204_A_1_S_1_ATP-dependent_Clp_protease_proteolytic_subunit_CDS_2		25 kDa		0.0012	2.9	Glucose low, Toxin high	unknown	7.1759	9.2616	9.6689	23.823	23.196	29.12
252	TRUE	Empty	Bifidobacterium asteroides strain wkB204, whole genome shotgun sequence	204_A_1_S_1_ileS_CDS		126 kDa		0.0052	0.5	Glucose high, Toxin low	unknown	20.502	17.494	20.412	8.2463	12.565	8.033
215	TRUE	Empty	Bifidobacterium asteroides strain wkB204, whole genome shotgun sequence	204_A_1_S_4_RICIN_domain-containing_protein_CDS		89 kDa		0.034	0.7	[]	unknown	23.578	17.494	21.486	11.911	15.464	15.062
197	TRUE	Empty	Bifidobacterium asteroides strain wkB204, whole genome shotgun sequence	204_A_1_S_6_Type_1_glutamine_amidotransferase-like_domain-containing_protein_CDS		22 kDa		0.099	0.8	[]	unknown	23.578	19.552	18.263	16.493	15.464	18.074
91	TRUE	Empty	Bifidobacterium asteroides strain wkB204, whole genome shotgun sequence	204_A_1_S_2_argF_CDS		35 kDa		0.001	2.5	Glucose low, Toxin high	unknown	9.2261	12.349	9.6689	22.907	28.029	26.107
151	TRUE	Empty	Bifidobacterium asteroides strain wkB204, whole genome shotgun sequence	204_A_1_S_2_transcription_elongation_factor_GreA_CDS		17 kDa		0.01	1.2	Glucose low, Toxin high	unknown	13.327	15.436	13.966	18.325	17.397	17.07
228	TRUE	Empty	Bifidobacterium asteroides strain wkB204, whole genome shotgun sequence	204_A_1_S_3_G5_domain-containing_protein_CDS		51 kDa		0.021	0.6	Glucose high, Toxin low	unknown	18.452	25.727	20.412	13.744	13.531	13.054
149	TRUE	Empty	Bifidobacterium asteroides strain wkB204, whole genome shotgun sequence	204_A_1_S_4_rpsP_CDS		17 kDa		0.04	1.3	[]	unknown	11.276	13.378	12.892	14.66	17.397	15.062
123	TRUE	Empty	Bifidobacterium asteroides strain wkB204, whole genome shotgun sequence	204_A_1_S_2_FAD-dependent_oxidoreductase_CDS		53 kDa		0.0037	1.7	Glucose low, Toxin high	unknown	12.301	14.407	10.743	19.241	22.23	21.087
299	TRUE	Empty	Bifidobacterium asteroides strain wkB204, whole genome shotgun sequence	204_A_1_S_3_inorganic_diphosphatase_CDS		18 kDa		0.021	0.2	Glucose high, Toxin low	unknown	27.678	34.988	16.115	6.4138	6.7656	4.0165
219	TRUE	Empty	Phosphatidylglycerol/phosphatidylinositol transfer protein OS=Saccharomyces cerevisiae (strain ATCC 204508 / S288c) OX=559292 GN=NPC2 PE=1 SV=1	Q12408	NPC2	19 kDa		0.0091	0.7	Glucose high, Toxin low	unknown	22.553	18.523	20.412	11.911	13.531	15.062
69	TRUE	Empty	Bifidobacterium asteroides strain wkB204, whole genome shotgun sequence	204_A_1_S_5_FAD-dependent_oxidoreductase_CDS		54 kDa		0.0023	4.1	Glucose low, Toxin high	unknown	3.0754	4.1163	8.5946	23.823	18.364	22.091
254	TRUE	Empty	Bifidobacterium asteroides strain wkB204, whole genome shotgun sequence	204_A_1_S_2_aminotransferase_class_I/II-fold_pyridoxal_phosphate-dependent_enzyme_CDS_3		?		0.0091	0.5	Glucose high, Toxin low	unknown	17.427	22.64	24.709	9.1626	10.632	12.049
211	TRUE	Empty	Protein YGP1 OS=Saccharomyces cerevisiae (strain ATCC 204508 / S288c) OX=559292 GN=YGP1 PE=1 SV=2	P38616	YGP1	37 kDa		0.067	0.7	[]	unknown	14.352	14.407	19.338	10.995	9.6651	13.054
160	TRUE	Empty	Bifidobacterium asteroides strain wkB204, whole genome shotgun sequence	204_A_1_S_2_Ohr_family_peroxiredoxin_CDS		16 kDa		0.27	1.1	[]	unknown	16.402	13.378	18.263	17.409	17.397	19.078
209	TRUE	Empty	Bifidobacterium asteroides strain wkB204, whole genome shotgun sequence	204_A_1_S_5_InlB_B-repeat-containing_protein_CDS		96 kDa	TRUE	0.074	0.7	[]	unknown	16.402	21.611	17.189	13.744	15.464	11.045
322	TRUE	Empty	SWISS-PROT:P02533 Tax_Id=9606 Gene_Symbol=KRT14 Keratin, type I cytoskeletal 14	P02533		52 kDa	TRUE	0.25	0.06	[]	unknown	51.256	14.407	0	0	3.866	0
100	TRUE	Empty	Bifidobacterium asteroides strain wkB204, whole genome shotgun sequence	204_A_1_S_2_glucose_1-dehydrogenase_CDS		26 kDa		0.0017	2.2	Glucose low, Toxin high	unknown	9.2261	9.2616	10.743	21.074	24.163	19.078
283	TRUE	Empty	Bifidobacterium asteroides strain wkB204, whole genome shotgun sequence	204_A_1_S_6_atpD_CDS		54 kDa		0.0095	0.3	Glucose high, Toxin low	unknown	21.528	19.552	30.081	6.4138	5.7991	10.041
98	TRUE	Empty	Bifidobacterium asteroides strain wkB204, whole genome shotgun sequence	204_A_1_S_2_hypothetical_protein_CDS_19		10 kDa		0.11	2.3	[]	unknown	12.301	13.378	3.223	32.985	14.498	20.082
269	TRUE	Empty	Bifidobacterium asteroides strain wkB204, whole genome shotgun sequence	204_A_1_S_1_tsf_CDS		30 kDa		0.0015	0.4	Glucose high, Toxin low	unknown	21.528	21.611	24.709	8.2463	7.7321	12.049
256	TRUE	Empty	Bifidobacterium asteroides strain wkB204, whole genome shotgun sequence	204_A_1_S_2_guaB_CDS		55 kDa		0.017	0.5	Glucose high, Toxin low	unknown	22.553	15.436	21.486	11.911	9.6651	7.0289
169	TRUE	Empty	Bifidobacterium asteroides strain wkB204, whole genome shotgun sequence	204_A_1_S_2_chromosome_condensation_regulator_RCC1_CDS		37 kDa	TRUE	0.75	1	[]	unknown	14.352	12.349	15.04	11.911	14.498	17.07
275	TRUE	Empty	Bifidobacterium asteroides strain wkB204, whole genome shotgun sequence	204_A_1_S_5_alpha-glucosidase_CDS		72 kDa		0.00048	0.4	Glucose high, Toxin low	unknown	21.528	21.611	20.412	10.079	6.7656	6.0247
328	TRUE	Empty	Bifidobacterium asteroides strain wkB204, whole genome shotgun sequence	204_A_1_S_3_gatA_CDS		55 kDa		< 0.00010	0.03	Glucose high, Toxin low	unknown	26.653	28.814	31.155	0	0	3.0124
173	TRUE	Empty	Bifidobacterium asteroides strain wkB204, whole genome shotgun sequence	204_A_1_S_4_rplI_CDS		16 kDa		0.94	1	[]	unknown	15.377	12.349	17.189	12.828	15.464	17.07
227	TRUE	Empty	Bifidobacterium asteroides strain wkB204, whole genome shotgun sequence	204_A_1_S_2_mltG_CDS		44 kDa		0.011	0.6	Glucose high, Toxin low	unknown	16.402	18.523	20.412	10.995	13.531	10.041
116	TRUE	Empty	Bifidobacterium asteroides strain wkB204, whole genome shotgun sequence	204_A_1_S_2_preprotein_translocase_subunit_YajC_CDS		22 kDa		0.018	1.8	Glucose low, Toxin high	unknown	14.352	10.291	8.5946	23.823	18.364	19.078
135	TRUE	Empty	Bifidobacterium asteroides strain wkB204, whole genome shotgun sequence	204_A_1_S_3_FMN-binding_protein_CDS		18 kDa		0.0066	1.4	Glucose low, Toxin high	unknown	12.301	11.32	13.966	17.409	19.33	17.07
266	TRUE	Empty	Bifidobacterium asteroides strain wkB204, whole genome shotgun sequence	204_A_1_S_4_SDR_family_oxidoreductase_CDS_2		27 kDa		0.017	0.4	Glucose high, Toxin low	unknown	17.427	15.436	13.966	10.079	6.7656	3.0124
132	TRUE	Empty	Bifidobacterium asteroides strain wkB204, whole genome shotgun sequence	204_A_1_S_4_cysS_CDS		59 kDa		0.016	1.5	Glucose low, Toxin high	unknown	10.251	12.349	10.743	17.409	17.397	14.058
305	TRUE	Empty	Bifidobacterium asteroides strain wkB204, whole genome shotgun sequence	204_A_1_S_4_gltX_CDS		58 kDa		0.0011	0.2	Glucose high, Toxin low	unknown	16.402	22.64	19.338	4.5813	2.8995	3.0124
144	TRUE	Empty	Bifidobacterium asteroides strain wkB204, whole genome shotgun sequence	204_A_1_S_3_extracellular_solute-binding_protein_CDS_2		47 kDa		0.023	1.3	Glucose low, Toxin high	unknown	13.327	10.291	10.743	15.576	14.498	15.062
230	TRUE	Empty	Bifidobacterium asteroides strain wkB204, whole genome shotgun sequence	204_A_1_S_3_hypothetical_protein_CDS_17		93 kDa	TRUE	0.097	0.6	[]	unknown	14.352	20.581	17.189	15.576	6.7656	9.0371
331	TRUE	Empty	SWISS-PROT:P08779 Tax_Id=9606 Gene_Symbol=KRT16 Keratin, type I cytoskeletal 16	P08779		51 kDa	TRUE	0.28	0	[]	unknown	50.231	8.2326	0	0	0	0
246	TRUE	Empty	Bifidobacterium asteroides strain wkB204, whole genome shotgun sequence	204_A_1_S_4_glycerophosphodiester_phosphodiesterase_CDS_2		15 kDa		0.014	0.5	Glucose high, Toxin low	unknown	19.477	17.494	17.189	11.911	5.7991	11.045
70	TRUE	Empty	Bifidobacterium asteroides strain wkB204, whole genome shotgun sequence	204_A_1_S_2_fmt_CDS		35 kDa		0.0021	4	Glucose low, Toxin high	unknown	4.1005	5.1454	5.3716	15.576	22.23	21.087
260	TRUE	Empty	Bifidobacterium asteroides strain wkB204, whole genome shotgun sequence	204_A_1_S_2_pyk_CDS		52 kDa		0.0013	0.5	Glucose high, Toxin low	unknown	19.477	19.552	17.189	9.1626	6.7656	10.041
104	TRUE	Empty	Bifidobacterium asteroides strain wkB204, whole genome shotgun sequence	204_A_1_S_2_pyrE_CDS		26 kDa		0.025	2.1	Glucose low, Toxin high	unknown	6.1507	11.32	6.4459	18.325	19.33	13.054
118	TRUE	Empty	Bifidobacterium asteroides strain wkB204, whole genome shotgun sequence	204_A_1_S_3_hypothetical_protein_CDS_15		52 kDa		0.042	1.8	[]	unknown	9.2261	12.349	7.5202	17.409	13.531	21.087
277	TRUE	Empty	Bifidobacterium asteroides strain wkB204, whole genome shotgun sequence	204_A_1_S_3_ugpC_CDS		41 kDa		0.033	0.4	[]	unknown	16.402	14.407	26.858	6.4138	5.7991	8.033
85	TRUE	Empty	Bifidobacterium asteroides strain wkB204, whole genome shotgun sequence	204_A_1_S_1_dxr_CDS		46 kDa		0.00094	2.7	Glucose low, Toxin high	unknown	7.1759	6.1744	8.5946	17.409	21.263	21.087
146	TRUE	Empty	Bifidobacterium asteroides strain wkB204, whole genome shotgun sequence	204_A_1_S_1_phosphate_ABC_transporter_substrate-binding_protein_PstS_CDS		38 kDa		0.2	1.3	[]	unknown	17.427	11.32	9.6689	17.409	17.397	15.062
172	TRUE	Empty	Bifidobacterium asteroides strain wkB204, whole genome shotgun sequence	204_A_1_S_2_metK_CDS		44 kDa		0.93	1	[]	unknown	13.327	17.494	10.743	15.576	12.565	14.058
186	TRUE	Empty	Bifidobacterium asteroides strain wkB204, whole genome shotgun sequence	204_A_1_S_6_hypothetical_protein_CDS_8		23 kDa		0.19	0.9	[]	unknown	14.352	13.378	12.892	10.995	13.531	12.049
327	TRUE	Empty	Bifidobacterium asteroides strain wkB204, whole genome shotgun sequence	204_A_1_S_2_fusA_CDS		79 kDa		0.00035	0.04	Glucose high, Toxin low	unknown	21.528	25.727	27.932	0	0	3.0124
68	TRUE	Empty	Bifidobacterium asteroides strain wkB204, whole genome shotgun sequence	204_A_1_S_2_NAD(P)H-dependent_oxidoreductase_CDS_3		23 kDa		< 0.00010	4.1	Glucose low, Toxin high	unknown	5.1256	6.1744	5.3716	22.907	24.163	22.091
318	TRUE	Empty	Bifidobacterium asteroides strain wkB204, whole genome shotgun sequence	204_A_1_S_6_pgm_CDS		60 kDa		0.012	0.1	Glucose high, Toxin low	unknown	29.729	14.407	22.561	2.7488	0	4.0165
223	TRUE	Empty	Bifidobacterium asteroides strain wkB204, whole genome shotgun sequence	204_A_1_S_5_FHA_domain-containing_protein_CDS_2		26 kDa		0.03	0.6	[]	unknown	18.452	17.494	12.892	10.995	10.632	10.041
61	TRUE	Empty	Bifidobacterium asteroides strain wkB204, whole genome shotgun sequence	204_A_1_S_2_pyridoxamine_kinase_CDS		33 kDa		0.0025	5	Glucose low, Toxin high	unknown	5.1256	6.1744	0	17.409	21.263	18.074
273	TRUE	Empty	Bifidobacterium asteroides strain wkB204, whole genome shotgun sequence	204_A_1_S_1_DUF349_domain-containing_protein_CDS		58 kDa		0.0036	0.4	Glucose high, Toxin low	unknown	18.452	18.523	17.189	6.4138	3.866	10.041
148	TRUE	Empty	Bifidobacterium asteroides strain wkB204, whole genome shotgun sequence	204_A_1_S_3_YbhB/YbcL_family_Raf_kinase_inhibitor-like_protein_CDS		21 kDa		0.21	1.3	[]	unknown	9.2261	9.2616	15.04	13.744	14.498	14.058
332	TRUE	Empty	Bifidobacterium asteroides strain wkB204, whole genome shotgun sequence	204_A_1_S_4_nicotinate_phosphoribosyltransferase_CDS		48 kDa		0.00016	0	Glucose high, Toxin low	unknown	22.553	26.756	29.007	0	0	0
301	TRUE	Empty	Bifidobacterium asteroides strain wkB204, whole genome shotgun sequence	204_A_1_S_1_nucleoside_hydrolase_CDS		34 kDa		0.00041	0.2	Glucose high, Toxin low	unknown	17.427	21.611	20.412	2.7488	4.8326	5.0206
199	TRUE	Empty	Bifidobacterium asteroides strain wkB204, whole genome shotgun sequence	204_A_1_S_4_rpsF_CDS		11 kDa		0.18	0.8	[]	unknown	13.327	12.349	9.6689	7.3301	10.632	10.041
89	TRUE	Empty	Bifidobacterium asteroides strain wkB204, whole genome shotgun sequence	204_A_1_S_6_mtnN_CDS		26 kDa		0.00037	2.6	Glucose low, Toxin high	unknown	7.1759	6.1744	5.3716	15.576	17.397	15.062
67	TRUE	Empty	Bifidobacterium asteroides strain wkB204, whole genome shotgun sequence	204_A_1_S_2_branched-chain_amino_acid_aminotransferase_CDS		41 kDa		0.0022	4.2	Glucose low, Toxin high	unknown	4.1005	3.0872	6.4459	15.576	21.263	21.087
165	TRUE	Empty	Bifidobacterium asteroides strain wkB204, whole genome shotgun sequence	204_A_1_S_6_rplD_CDS		24 kDa		0.56	1.1	[]	unknown	13.327	11.32	10.743	10.995	12.565	14.058
317	TRUE	Empty	Bifidobacterium asteroides strain wkB204, whole genome shotgun sequence	204_A_1_S_6_nrdE_CDS		83 kDa		0.00048	0.1	Glucose high, Toxin low	unknown	18.452	22.64	22.561	2.7488	0	4.0165
176	TRUE	Empty	Bifidobacterium asteroides strain wkB204, whole genome shotgun sequence	204_A_1_S_1_phosphotransferase_CDS		58 kDa		0.92	1	[]	unknown	11.276	8.2326	11.818	9.1626	9.6651	12.049
236	TRUE	Empty	Bifidobacterium asteroides strain wkB204, whole genome shotgun sequence	204_A_1_S_1_aldo/keto_reductase_CDS		31 kDa		0.0018	0.6	Glucose high, Toxin low	unknown	15.377	13.378	16.115	8.2463	8.6986	9.0371
202	TRUE	Empty	Bifidobacterium asteroides strain wkB204, whole genome shotgun sequence	204_A_1_S_1_ribose-phosphate_diphosphokinase_CDS		37 kDa		0.19	0.8	[]	unknown	9.2261	8.2326	8.5946	4.5813	8.6986	7.0289
97	TRUE	Empty	Bifidobacterium asteroides strain wkB204, whole genome shotgun sequence	204_A_1_S_6_adenylate_kinase_CDS		21 kDa		0.0034	2.3	Glucose low, Toxin high	unknown	6.1507	5.1454	6.4459	11.911	13.531	16.066
124	TRUE	Empty	Bifidobacterium asteroides strain wkB204, whole genome shotgun sequence	204_A_1_S_2_cold-shock_protein_CDS		7 kDa		0.024	1.7	Glucose low, Toxin high	unknown	8.201	8.2326	10.743	13.744	13.531	18.074
290	TRUE	Empty	Bifidobacterium asteroides strain wkB204, whole genome shotgun sequence	204_A_1_S_4_murA_CDS		48 kDa		0.015	0.3	Glucose high, Toxin low	unknown	12.301	21.611	17.189	7.3301	3.866	3.0124
178	TRUE	Empty	Bifidobacterium asteroides strain wkB204, whole genome shotgun sequence	204_A_1_S_1_DUF881_domain-containing_protein_CDS		31 kDa		0.84	1	[]	unknown	10.251	11.32	13.966	10.995	10.632	13.054
233	TRUE	Empty	Bifidobacterium asteroides strain wkB204, whole genome shotgun sequence	204_A_1_S_8_SDR_family_oxidoreductase_CDS		27 kDa		0.0032	0.6	Glucose high, Toxin low	unknown	14.352	15.436	16.115	7.3301	9.6651	10.041
265	TRUE	Empty	SWISS-PROT:P02754 Beta-lactoglobulin - Bos taurus (Bovine).	P02754		18 kDa		0.03	0.4	[]	unknown	15.377	11.32	12.892	7.3301	1.933	8.033
163	TRUE	Empty	Bifidobacterium asteroides strain wkB204, whole genome shotgun sequence	204_A_1_S_1_DUF3107_domain-containing_protein_CDS		8 kDa		0.64	1.1	[]	unknown	10.251	11.32	7.5202	12.828	9.6651	9.0371
291	TRUE	Empty	Bifidobacterium asteroides strain wkB204, whole genome shotgun sequence	204_A_1_S_6_atpA_CDS		60 kDa		0.0005	0.3	Glucose high, Toxin low	unknown	14.352	16.465	18.263	4.5813	4.8326	4.0165
126	TRUE	Empty	Bifidobacterium asteroides strain wkB204, whole genome shotgun sequence	204_A_1_S_1_trxA_CDS		12 kDa		0.039	1.6	[]	unknown	5.1256	7.2035	8.5946	10.995	9.6651	13.054
303	TRUE	Empty	Bifidobacterium asteroides strain wkB204, whole genome shotgun sequence	204_A_1_S_1_serine_hydroxymethyltransferase_CDS		47 kDa		0.0029	0.2	Glucose high, Toxin low	unknown	11.276	13.378	17.189	2.7488	2.8995	2.0082
214	TRUE	Empty	Bifidobacterium asteroides strain wkB204, whole genome shotgun sequence	204_A_1_S_2_phosphoribosylaminoimidazolesuccinocarboxamide_synthase_CDS		28 kDa		0.11	0.7	[]	unknown	9.2261	9.2616	13.966	6.4138	7.7321	8.033
92	TRUE	Empty	Bifidobacterium asteroides strain wkB204, whole genome shotgun sequence	204_A_1_S_7_hypothetical_protein_CDS		50 kDa		0.0017	2.4	Glucose low, Toxin high	unknown	5.1256	6.1744	6.4459	12.828	16.431	14.058
72	TRUE	Empty	Bifidobacterium asteroides strain wkB204, whole genome shotgun sequence	204_A_1_S_2_HAD-IIA_family_hydrolase_CDS		38 kDa		0.013	3.9	Glucose low, Toxin high	unknown	5.1256	6.1744	0	17.409	11.598	15.062
3	TRUE	Empty	Bifidobacterium asteroides strain wkB204, whole genome shotgun sequence	204_A_1_S_6_dapC_CDS		41 kDa		< 0.00010	INF	Glucose low, Toxin high	unknown	0	0	0	19.241	23.196	22.091
274	TRUE	Empty	Bifidobacterium asteroides strain wkB204, whole genome shotgun sequence	204_A_1_S_2_DUF5719_family_protein_CDS		52 kDa		< 0.00010	0.4	Glucose high, Toxin low	unknown	13.327	12.349	13.966	4.5813	4.8326	5.0206
333	TRUE	Empty	Bifidobacterium asteroides strain wkB204, whole genome shotgun sequence	204_A_1_S_1_tig_CDS		50 kDa		0.0072	0	Glucose high, Toxin low	unknown	14.352	18.523	27.932	0	0	0
334	TRUE	Empty	Bifidobacterium asteroides strain wkB204, whole genome shotgun sequence	204_A_1_S_3_3-hydroxyacyl-CoA_dehydrogenase_CDS		33 kDa		0.0029	0	Glucose high, Toxin low	unknown	18.452	12.349	21.486	0	0	0
335	TRUE	Empty	Bifidobacterium asteroides strain wkB204, whole genome shotgun sequence	204_A_1_S_1_penicillin-binding_protein_2_CDS		64 kDa		< 0.00010	0	Glucose high, Toxin low	unknown	18.452	19.552	17.189	0	0	0
4	TRUE	Empty	Bifidobacterium asteroides strain wkB204, whole genome shotgun sequence	204_A_1_S_1_alpha-mannosidase_CDS		117 kDa		< 0.00010	INF	Glucose low, Toxin high	unknown	0	0	0	19.241	18.364	20.082
251	TRUE	Empty	Bifidobacterium asteroides strain wkB204, whole genome shotgun sequence	204_A_1_S_6_rplE_CDS		21 kDa		0.023	0.5	Glucose high, Toxin low	unknown	12.301	9.2616	12.892	4.5813	4.8326	8.033
54	TRUE	Empty	Bifidobacterium asteroides strain wkB204, whole genome shotgun sequence	204_A_1_S_2_histidine_phosphatase_family_protein_CDS_2		25 kDa		0.00082	10	Glucose low, Toxin high	unknown	3.0754	0	2.1486	16.493	16.431	21.087
336	TRUE	Empty	Bifidobacterium asteroides strain wkB204, whole genome shotgun sequence	204_A_1_S_1_DNA-directed_RNA_polymerase_subunit_beta'_CDS		153 kDa		0.0077	0	Glucose high, Toxin low	unknown	11.276	18.523	23.635	0	0	0
337	TRUE	Empty	SWISS-PROT:Q9QWL7 Tax_Id=10090 Gene_Symbol=Krt17 Keratin, type I cytoskeletal 17	Q9QWL7		48 kDa	TRUE	0.13	0	[]	unknown	18.452	12.349	0	0	0	0
179	TRUE	Empty	Bifidobacterium asteroides strain wkB204, whole genome shotgun sequence	204_A_1_S_6_infA_CDS		8 kDa		0.69	1	[]	unknown	9.2261	9.2616	9.6689	7.3301	9.6651	10.041
240	TRUE	Empty	Superoxide dismutase [Mn], mitochondrial OS=Saccharomyces cerevisiae (strain ATCC 204508 / S288c) OX=559292 GN=SOD2 PE=1 SV=1	P00447	SOD2	26 kDa		0.03	0.6	[]	unknown	6.1507	8.2326	9.6689	4.5813	3.866	5.0206
88	TRUE	Empty	Bifidobacterium asteroides strain wkB204, whole genome shotgun sequence	204_A_1_S_3_hypothetical_protein_CDS_3		13 kDa		0.024	2.6	Glucose low, Toxin high	unknown	8.201	3.0872	3.223	15.576	10.632	12.049
5	TRUE	Empty	Bifidobacterium asteroides strain wkB204, whole genome shotgun sequence	204_A_1_S_3_YggS_family_pyridoxal_phosphate-dependent_enzyme_CDS		29 kDa		< 0.00010	INF	Glucose low, Toxin high	unknown	0	0	0	15.576	17.397	14.058
184	TRUE	Empty	Bifidobacterium asteroides strain wkB204, whole genome shotgun sequence	204_A_1_S_4_catalase_CDS		55 kDa		0.72	0.9	[]	unknown	9.2261	9.2616	6.4459	5.4976	8.6986	9.0371
279	TRUE	Empty	Bifidobacterium asteroides strain wkB204, whole genome shotgun sequence	204_A_1_S_2_efp_CDS		21 kDa		0.019	0.3	Glucose high, Toxin low	unknown	9.2261	11.32	10.743	5.4976	4.8326	0
238	TRUE	Empty	Bifidobacterium asteroides strain wkB204, whole genome shotgun sequence	204_A_1_S_6_rpsE_CDS		27 kDa		0.13	0.6	[]	unknown	12.301	11.32	6.4459	8.2463	3.866	5.0206
155	TRUE	Empty	Bifidobacterium asteroides strain wkB204, whole genome shotgun sequence	204_A_1_S_1_glutamate_ABC_transporter_substrate-binding_protein_CDS		30 kDa		0.2	1.2	[]	unknown	6.1507	7.2035	7.5202	9.1626	6.7656	9.0371
287	TRUE	Empty	Bifidobacterium asteroides strain wkB204, whole genome shotgun sequence	204_A_1_S_1_L,D-transpeptidase/peptidoglycan_binding_protein_CDS		58 kDa		0.00025	0.3	Glucose high, Toxin low	unknown	13.327	11.32	12.892	2.7488	3.866	4.0165
142	TRUE	Empty	Bifidobacterium asteroides strain wkB204, whole genome shotgun sequence	204_A_1_S_3_fumarylacetoacetate_hydrolase_family_protein_CDS		30 kDa		0.15	1.3	[]	unknown	7.1759	4.1163	5.3716	8.2463	6.7656	7.0289
6	TRUE	Empty	Bifidobacterium asteroides strain wkB204, whole genome shotgun sequence	204_A_1_S_1_glutamate-cysteine_ligase_family_protein_CDS		48 kDa		0.00094	INF	Glucose low, Toxin high	unknown	0	0	0	11.911	13.531	9.0371
138	TRUE	Empty	Bifidobacterium asteroides strain wkB204, whole genome shotgun sequence	204_A_1_S_3_glf_CDS		46 kDa		0.34	1.4	[]	unknown	4.1005	6.1744	9.6689	6.4138	11.598	9.0371
153	TRUE	Empty	Bifidobacterium asteroides strain wkB204, whole genome shotgun sequence	204_A_1_S_1_hisB_CDS		21 kDa		0.24	1.2	[]	unknown	5.1256	9.2616	7.5202	9.1626	8.6986	9.0371
338	TRUE	Empty	Bifidobacterium asteroides strain wkB204, whole genome shotgun sequence	204_A_1_S_1_rpoB_CDS		132 kDa		< 0.00010	0	Glucose high, Toxin low	unknown	13.327	16.465	15.04	0	0	0
295	TRUE	Empty	Bifidobacterium asteroides strain wkB204, whole genome shotgun sequence	204_A_1_S_5_pknB_CDS		77 kDa		0.00053	0.2	Glucose high, Toxin low	unknown	13.327	10.291	11.818	2.7488	2.8995	3.0124
326	TRUE	Empty	Bifidobacterium asteroides strain wkB204, whole genome shotgun sequence	204_A_1_S_3_C69_family_dipeptidase_CDS		57 kDa		0.0019	0.04	Glucose high, Toxin low	unknown	11.276	17.494	16.115	1.8325	0	0
325	TRUE	Empty	Bifidobacterium asteroides strain wkB204, whole genome shotgun sequence	204_A_1_S_6_DNA-directed_RNA_polymerase_subunit_alpha_CDS		36 kDa		0.00014	0.04	Glucose high, Toxin low	unknown	14.352	16.465	13.966	0	1.933	0
339	TRUE	Empty	Bifidobacterium asteroides strain wkB204, whole genome shotgun sequence	204_A_1_S_4_metG_CDS		70 kDa		0.0027	0	Glucose high, Toxin low	unknown	9.2261	15.436	15.04	0	0	0
137	TRUE	Empty	Bifidobacterium asteroides strain wkB204, whole genome shotgun sequence	204_A_1_S_6_tetratricopeptide_repeat_protein_CDS		34 kDa		0.1	1.4	[]	unknown	8.201	7.2035	5.3716	10.079	7.7321	11.045
340	TRUE	Empty	Bifidobacterium asteroides strain wkB204, whole genome shotgun sequence	204_A_1_S_6_polyribonucleotide_nucleotidyltransferase_CDS		102 kDa		0.022	0	Glucose high, Toxin low	unknown	6.1507	8.2326	15.04	0	0	0
7	TRUE	Empty	Bifidobacterium asteroides strain wkB204, whole genome shotgun sequence	204_A_1_S_2_alpha/beta_hydrolase_CDS_5		50 kDa		< 0.00010	INF	Glucose low, Toxin high	unknown	0	0	0	13.744	13.531	14.058
321	TRUE	Empty	Bifidobacterium asteroides strain wkB204, whole genome shotgun sequence	204_A_1_S_2_purK_CDS		43 kDa		0.00055	0.07	Glucose high, Toxin low	unknown	12.301	13.378	15.04	0	2.8995	0
315	TRUE	Empty	Bifidobacterium asteroides strain wkB204, whole genome shotgun sequence	204_A_1_S_3_ilvC_CDS		39 kDa		0.0065	0.1	Glucose high, Toxin low	unknown	11.276	11.32	15.04	0	0	5.0206
8	TRUE	Empty	Bifidobacterium asteroides strain wkB204, whole genome shotgun sequence	204_A_1_S_2_nucleoside_hydrolase_CDS		34 kDa		< 0.00010	INF	Glucose low, Toxin high	unknown	0	0	0	13.744	14.498	14.058
224	TRUE	Empty	Bifidobacterium asteroides strain wkB204, whole genome shotgun sequence	204_A_1_S_6_rpsC_CDS		32 kDa		0.28	0.6	[]	unknown	9.2261	8.2326	3.223	5.4976	3.866	4.0165
286	TRUE	Empty	Bifidobacterium asteroides strain wkB204, whole genome shotgun sequence	204_A_1_S_6_universal_stress_protein_CDS		37 kDa		< 0.00010	0.3	Glucose high, Toxin low	unknown	11.276	11.32	11.818	3.665	3.866	3.0124
53	TRUE	Empty	Bifidobacterium asteroides strain wkB204, whole genome shotgun sequence	204_A_1_S_2_aminotransferase_class_I/II-fold_pyridoxal_phosphate-dependent_enzyme_CDS		?		0.0025	13	Glucose low, Toxin high	unknown	0	0	3.223	11.911	16.431	12.049
9	TRUE	Empty	Bifidobacterium asteroides strain wkB204, whole genome shotgun sequence	204_A_1_S_1_dut_CDS		16 kDa		< 0.00010	INF	Glucose low, Toxin high	unknown	0	0	0	12.828	11.598	14.058
171	TRUE	Empty	Bifidobacterium asteroides strain wkB204, whole genome shotgun sequence	204_A_1_S_6_nrdF_CDS_2		37 kDa		0.9	1	[]	unknown	6.1507	8.2326	5.3716	7.3301	5.7991	7.0289
225	TRUE	Empty	Bifidobacterium asteroides strain wkB204, whole genome shotgun sequence	204_A_1_S_6_pyridoxal_phosphate-dependent_aminotransferase_CDS		43 kDa		0.13	0.6	[]	unknown	6.1507	10.291	7.5202	3.665	6.7656	5.0206
237	TRUE	Empty	Bifidobacterium asteroides strain wkB204, whole genome shotgun sequence	204_A_1_S_6_cell_division_protein_CDS		62 kDa		0.3	0.6	[]	unknown	11.276	9.2616	5.3716	10.079	2.8995	2.0082
316	TRUE	Empty	Bifidobacterium asteroides strain wkB204, whole genome shotgun sequence	204_A_1_S_1_ftsZ_CDS		41 kDa		0.002	0.1	Glucose high, Toxin low	unknown	10.251	10.291	11.818	3.665	0	0
313	TRUE	Empty	Bifidobacterium asteroides strain wkB204, whole genome shotgun sequence	204_A_1_S_3_amidohydrolase_family_protein_CDS		48 kDa		0.0027	0.1	Glucose high, Toxin low	unknown	11.276	12.349	8.5946	2.7488	1.933	0
222	TRUE	Empty	Bifidobacterium asteroides strain wkB204, whole genome shotgun sequence	204_A_1_S_2_HU_family_DNA-binding_protein_CDS		10 kDa		0.0057	0.7	Glucose high, Toxin low	unknown	10.251	9.2616	8.5946	5.4976	6.7656	6.0247
257	TRUE	Empty	Bifidobacterium asteroides strain wkB204, whole genome shotgun sequence	204_A_1_S_6_nusG_CDS		30 kDa		0.0013	0.5	Glucose high, Toxin low	unknown	10.251	9.2616	10.743	5.4976	3.866	5.0206
300	TRUE	Empty	Bifidobacterium asteroides strain wkB204, whole genome shotgun sequence	204_A_1_S_6_rplB_CDS		30 kDa		0.0085	0.2	Glucose high, Toxin low	unknown	12.301	8.2326	9.6689	3.665	2.8995	0
55	TRUE	Empty	Bifidobacterium asteroides strain wkB204, whole genome shotgun sequence	204_A_1_S_2_TIGR00730_family_Rossman_fold_protein_CDS		28 kDa		0.0024	8.7	Glucose low, Toxin high	unknown	0	3.0872	0	8.2463	8.6986	10.041
147	TRUE	Empty	Bifidobacterium asteroides strain wkB204, whole genome shotgun sequence	204_A_1_S_2_FKBP-type_peptidyl-prolyl_cis-trans_isomerase_CDS		14 kDa		0.22	1.3	[]	unknown	6.1507	5.1454	7.5202	7.3301	6.7656	10.041
258	TRUE	Empty	Bifidobacterium asteroides strain wkB204, whole genome shotgun sequence	204_A_1_S_4_rph_CDS		28 kDa		0.0013	0.5	Glucose high, Toxin low	unknown	9.2261	10.291	10.743	5.4976	3.866	5.0206
127	TRUE	Empty	Bifidobacterium asteroides strain wkB204, whole genome shotgun sequence	204_A_1_S_6_rplQ_CDS		23 kDa		0.17	1.6	[]	unknown	8.201	4.1163	4.2973	11.911	6.7656	8.033
10	TRUE	Empty	Bifidobacterium asteroides strain wkB204, whole genome shotgun sequence	204_A_1_S_1_L-ribulose-5-phosphate_4-epimerase_CDS		25 kDa		0.00054	INF	Glucose low, Toxin high	unknown	0	0	0	10.079	12.565	9.0371
229	TRUE	Empty	Bifidobacterium asteroides strain wkB204, whole genome shotgun sequence	204_A_1_S_1_hisS_CDS		51 kDa		0.034	0.6	[]	unknown	8.201	7.2035	9.6689	6.4138	3.866	5.0206
129	TRUE	Empty	Bifidobacterium asteroides strain wkB204, whole genome shotgun sequence	204_A_1_S_6_hypothetical_protein_CDS_4		15 kDa		0.068	1.6	[]	unknown	7.1759	4.1163	4.2973	9.1626	6.7656	9.0371
310	TRUE	Empty	Bifidobacterium asteroides strain wkB204, whole genome shotgun sequence	204_A_1_S_2_MetQ/NlpA_family_ABC_transporter_substrate-binding_protein_CDS		32 kDa		0.0016	0.2	Glucose high, Toxin low	unknown	10.251	9.2616	11.818	0	1.933	3.0124
341	TRUE	Empty	Bifidobacterium asteroides strain wkB204, whole genome shotgun sequence	204_A_1_S_6_argS_CDS		64 kDa		< 0.00010	0	Glucose high, Toxin low	unknown	9.2261	10.291	9.6689	0	0	0
11	TRUE	Empty	Bifidobacterium asteroides strain wkB204, whole genome shotgun sequence	204_A_1_S_1_glycerol_dehydrogenase_CDS		38 kDa		0.002	INF	Glucose low, Toxin high	unknown	0	0	0	7.3301	10.632	7.0289
200	TRUE	Empty	Bifidobacterium asteroides strain wkB204, whole genome shotgun sequence	204_A_1_S_6_rplL_CDS		13 kDa		0.2	0.8	[]	unknown	8.201	6.1744	8.5946	7.3301	4.8326	6.0247
284	TRUE	Empty	Bifidobacterium asteroides strain wkB204, whole genome shotgun sequence	204_A_1_S_1_PFL_family_protein_CDS		47 kDa		0.012	0.3	Glucose high, Toxin low	unknown	10.251	11.32	6.4459	2.7488	2.8995	3.0124
12	TRUE	Empty	Bifidobacterium asteroides strain wkB204, whole genome shotgun sequence	204_A_1_S_3_thymidine_phosphorylase_CDS		25 kDa		0.0017	INF	Glucose low, Toxin high	unknown	0	0	0	9.1626	5.7991	7.0289
83	TRUE	Empty	Bifidobacterium asteroides strain wkB204, whole genome shotgun sequence	204_A_1_S_2_SufS_family_cysteine_desulfurase_CDS		45 kDa		0.039	2.8	[]	unknown	6.1507	3.0872	0	8.2463	9.6651	8.033
342	TRUE	Empty	Bifidobacterium asteroides strain wkB204, whole genome shotgun sequence	204_A_1_S_4_NAD(P)/FAD-dependent_oxidoreductase_CDS		43 kDa		0.001	0	Glucose high, Toxin low	unknown	9.2261	12.349	13.966	0	0	0
245	TRUE	Empty	Bifidobacterium asteroides strain wkB204, whole genome shotgun sequence	204_A_1_S_4_glycoside_hydrolase_family_43_protein_CDS		40 kDa		0.15	0.5	[]	unknown	7.1759	12.349	5.3716	5.4976	3.866	4.0165
64	TRUE	Empty	Bifidobacterium asteroides strain wkB204, whole genome shotgun sequence	204_A_1_S_2_hypothetical_protein_CDS_26		17 kDa		0.0053	4.5	Glucose low, Toxin high	unknown	0	3.0872	3.223	10.995	9.6651	8.033
166	TRUE	Empty	Bifidobacterium asteroides strain wkB204, whole genome shotgun sequence	204_A_1_S_6_Rid_family_detoxifying_hydrolase_CDS		13 kDa		0.94	1.1	[]	unknown	6.1507	0	5.3716	7.3301	4.8326	0
292	TRUE	Empty	Bifidobacterium asteroides strain wkB204, whole genome shotgun sequence	204_A_1_S_2_CTP_synthase_CDS		61 kDa		0.031	0.3	[]	unknown	9.2261	7.2035	12.892	2.7488	0	5.0206
271	TRUE	Empty	Bifidobacterium asteroides strain wkB204, whole genome shotgun sequence	204_A_1_S_2_sufC_CDS		28 kDa		0.17	0.4	[]	unknown	12.301	7.2035	4.2973	5.4976	0	4.0165
81	TRUE	Empty	Bifidobacterium asteroides strain wkB204, whole genome shotgun sequence	204_A_1_S_2_tryptophan-rich_sensory_protein_CDS		43 kDa		0.2	2.9	[]	unknown	0	8.2326	0	11.911	5.7991	6.0247
13	TRUE	Empty	Bifidobacterium asteroides strain wkB204, whole genome shotgun sequence	204_A_1_S_3_alpha-L-arabinofuranosidase_CDS		56 kDa		< 0.00010	INF	Glucose low, Toxin high	unknown	0	0	0	12.828	11.598	14.058
343	TRUE	Empty	Bifidobacterium asteroides strain wkB204, whole genome shotgun sequence	204_A_1_S_6_phoU_CDS		25 kDa		0.00018	0	Glucose high, Toxin low	unknown	14.352	11.32	11.818	0	0	0
56	TRUE	Empty	Bifidobacterium asteroides strain wkB204, whole genome shotgun sequence	204_A_1_S_6_F0F1_ATP_synthase_subunit_B_CDS		20 kDa		0.0091	7.5	Glucose low, Toxin high	unknown	0	0	3.223	7.3301	6.7656	10.041
14	TRUE	Empty	Bifidobacterium asteroides strain wkB204, whole genome shotgun sequence	204_A_1_S_6_LemA_family_protein_CDS		22 kDa		0.0017	INF	Glucose low, Toxin high	unknown	0	0	0	8.2463	12.565	9.0371
15	TRUE	Empty	Bifidobacterium asteroides strain wkB204, whole genome shotgun sequence	204_A_1_S_2_aminotransferase_class_I/II-fold_pyridoxal_phosphate-dependent_enzyme_CDS_2		?		0.00027	INF	Glucose low, Toxin high	unknown	0	0	0	10.079	10.632	8.033
319	TRUE	Empty	Bifidobacterium asteroides strain wkB204, whole genome shotgun sequence	204_A_1_S_1_thrC_CDS		54 kDa		0.0005	0.08	Glucose high, Toxin low	unknown	11.276	11.32	12.892	2.7488	0	0
212	TRUE	Empty	Nucleoside diphosphate kinase OS=Saccharomyces cerevisiae (strain ATCC 204508 / S288c) OX=559292 GN=YNK1 PE=1 SV=1	P36010	YNK1	17 kDa		0.23	0.7	[]	unknown	7.1759	6.1744	3.223	3.665	3.866	4.0165
288	TRUE	Empty	Bifidobacterium asteroides strain wkB204, whole genome shotgun sequence	204_A_1_S_2_orn_CDS		27 kDa		0.015	0.3	Glucose high, Toxin low	unknown	10.251	7.2035	9.6689	3.665	0	4.0165
308	TRUE	Empty	Bifidobacterium asteroides strain wkB204, whole genome shotgun sequence	204_A_1_S_1_rpsB_CDS		32 kDa		0.068	0.2	[]	unknown	3.0754	9.2616	9.6689	3.665	0	0
242	TRUE	Empty	Bifidobacterium asteroides strain wkB204, whole genome shotgun sequence	204_A_1_S_6_galE_CDS		37 kDa		0.011	0.5	Glucose high, Toxin low	unknown	8.201	6.1744	8.5946	4.5813	3.866	4.0165
131	TRUE	Empty	Bifidobacterium asteroides strain wkB204, whole genome shotgun sequence	204_A_1_S_4_single-stranded_DNA-binding_protein_CDS		21 kDa		0.011	1.5	Glucose low, Toxin high	unknown	5.1256	4.1163	4.2973	7.3301	6.7656	6.0247
255	TRUE	Empty	Bifidobacterium asteroides strain wkB204, whole genome shotgun sequence	204_A_1_S_3_iron_transporter_CDS		22 kDa		0.0052	0.5	Glucose high, Toxin low	unknown	8.201	7.2035	8.5946	3.665	2.8995	5.0206
221	TRUE	Empty	Bifidobacterium asteroides strain wkB204, whole genome shotgun sequence	204_A_1_S_4_GNAT_family_N-acetyltransferase_CDS_2		26 kDa		0.06	0.7	[]	unknown	8.201	7.2035	6.4459	6.4138	3.866	4.0165
73	TRUE	Empty	Bifidobacterium asteroides strain wkB204, whole genome shotgun sequence	204_A_1_S_2_thioredoxin_domain-containing_protein_CDS		38 kDa		0.068	3.8	[]	unknown	2.0502	0	2.1486	8.2463	3.866	4.0165
150	TRUE	Empty	Bifidobacterium asteroides strain wkB204, whole genome shotgun sequence	204_A_1_S_2_50S_ribosomal_protein_L25/general_stress_proteinCtc_CDS		23 kDa		0.51	1.2	[]	unknown	4.1005	4.1163	4.2973	3.665	3.866	8.033
320	TRUE	Empty	Bifidobacterium asteroides strain wkB204, whole genome shotgun sequence	204_A_1_S_1_raiA_CDS		25 kDa		0.0091	0.08	Glucose high, Toxin low	unknown	9.2261	5.1454	9.6689	1.8325	0	0
344	TRUE	Empty	Bifidobacterium asteroides strain wkB204, whole genome shotgun sequence	204_A_1_S_1_Gfo/Idh/MocA_family_oxidoreductase_CDS		38 kDa		0.00035	0	Glucose high, Toxin low	unknown	7.1759	9.2616	9.6689	0	0	0
16	TRUE	Empty	Bifidobacterium asteroides strain wkB204, whole genome shotgun sequence	204_A_1_S_6_rpmC_CDS		10 kDa		0.00051	INF	Glucose low, Toxin high	unknown	0	0	0	5.4976	7.7321	7.0289
345	TRUE	Empty	Bifidobacterium asteroides strain wkB204, whole genome shotgun sequence	204_A_1_S_2_NUDIX_hydrolase_CDS		22 kDa		0.0018	0	Glucose high, Toxin low	unknown	8.201	12.349	8.5946	0	0	0
314	TRUE	Empty	Bifidobacterium asteroides strain wkB204, whole genome shotgun sequence	204_A_1_S_4_pgl_CDS		29 kDa		0.015	0.1	Glucose high, Toxin low	unknown	6.1507	6.1744	9.6689	0	0	3.0124
17	TRUE	Empty	Bifidobacterium asteroides strain wkB204, whole genome shotgun sequence	204_A_1_S_2_DUF4190_domain-containing_protein_CDS		21 kDa		0.12	INF	[]	unknown	0	0	0	0	7.7321	8.033
268	TRUE	Empty	Bifidobacterium asteroides strain wkB204, whole genome shotgun sequence	204_A_1_S_6_rplU_CDS		11 kDa		0.071	0.4	[]	unknown	8.201	7.2035	5.3716	4.5813	0	4.0165
18	TRUE	Empty	Bifidobacterium asteroides strain wkB204, whole genome shotgun sequence	204_A_1_S_2_metal-sulfur_cluster_assembly_factor_CDS		25 kDa		0.00066	INF	Glucose low, Toxin high	unknown	0	0	0	10.079	11.598	8.033
99	TRUE	Empty	Bifidobacterium asteroides strain wkB204, whole genome shotgun sequence	204_A_1_S_6_rplX_CDS		12 kDa		0.0094	2.2	Glucose low, Toxin high	unknown	2.0502	3.0872	4.2973	7.3301	7.7321	6.0247
346	TRUE	Empty	Bifidobacterium asteroides strain wkB204, whole genome shotgun sequence	204_A_1_S_2_prfB_CDS		42 kDa		0.0097	0	Glucose high, Toxin low	unknown	8.201	7.2035	13.966	0	0	0
19	TRUE	Empty	Bifidobacterium asteroides strain wkB204, whole genome shotgun sequence	204_A_1_S_1_alpha/beta_hydrolase_CDS		31 kDa		0.00021	INF	Glucose low, Toxin high	unknown	0	0	0	9.1626	8.6986	7.0289
309	TRUE	Empty	Bifidobacterium asteroides strain wkB204, whole genome shotgun sequence	204_A_1_S_1_amino_acid_ABC_transporter_ATP-binding_protein_CDS_2		27 kDa		0.045	0.2	[]	unknown	7.1759	3.0872	7.5202	0	2.8995	0
307	TRUE	Empty	Bifidobacterium asteroides strain wkB204, whole genome shotgun sequence	204_A_1_S_2_sufD_CDS		45 kDa		0.011	0.2	Glucose high, Toxin low	unknown	8.201	6.1744	7.5202	3.665	0	0
347	TRUE	Empty	Bifidobacterium asteroides strain wkB204, whole genome shotgun sequence	204_A_1_S_2_pheS_CDS		39 kDa		0.0029	0	Glucose high, Toxin low	unknown	8.201	7.2035	11.818	0	0	0
220	TRUE	Empty	Bifidobacterium asteroides strain wkB204, whole genome shotgun sequence	204_A_1_S_6_rpsJ_CDS		12 kDa		0.14	0.7	[]	unknown	6.1507	5.1454	6.4459	1.8325	4.8326	5.0206
298	TRUE	Empty	Bifidobacterium asteroides strain wkB204, whole genome shotgun sequence	204_A_1_S_2_UPF0182_family_protein_CDS		115 kDa		0.026	0.2	Glucose high, Toxin low	unknown	6.1507	7.2035	7.5202	4.5813	0	0
348	TRUE	Empty	Bifidobacterium asteroides strain wkB204, whole genome shotgun sequence	204_A_1_S_6_nrdF_CDS		38 kDa		0.022	0	Glucose high, Toxin low	unknown	12.301	6.1744	5.3716	0	0	0
349	TRUE	Empty	Bifidobacterium asteroides strain wkB204, whole genome shotgun sequence	204_A_1_S_1_beta-N-acetylhexosaminidase_CDS		75 kDa		0.00048	0	Glucose high, Toxin low	unknown	7.1759	6.1744	8.5946	0	0	0
250	TRUE	Empty	Bifidobacterium asteroides strain wkB204, whole genome shotgun sequence	204_A_1_S_2_exodeoxyribonuclease_III_CDS		32 kDa		0.19	0.5	[]	unknown	5.1256	3.0872	5.3716	0	2.8995	4.0165
93	TRUE	Empty	Bifidobacterium asteroides strain wkB204, whole genome shotgun sequence	204_A_1_S_4_rpsR_CDS		9 kDa		0.048	2.4	[]	unknown	3.0754	0	3.223	5.4976	4.8326	5.0206
112	TRUE	Empty	Bifidobacterium asteroides strain wkB204, whole genome shotgun sequence	204_A_1_S_3_InlB_B-repeat-containing_protein_CDS_2		26 kDa	TRUE	0.54	1.9	[]	unknown	0	5.1454	0	0	4.8326	5.0206
57	TRUE	Empty	Bifidobacterium asteroides strain wkB204, whole genome shotgun sequence	204_A_1_S_>_hypothetical_protein_CDS_2		13 kDa		0.013	6.9	Glucose low, Toxin high	unknown	3.0754	0	0	6.4138	5.7991	9.0371
350	TRUE	Empty	Bifidobacterium asteroides strain wkB204, whole genome shotgun sequence	204_A_1_S_2_response_regulator_transcription_factor_CDS_5		27 kDa		0.012	0	Glucose high, Toxin low	unknown	3.0754	7.2035	6.4459	0	0	0
351	TRUE	Empty	Bifidobacterium asteroides strain wkB204, whole genome shotgun sequence	204_A_1_S_5_phosphoenolpyruvate_carboxylase_CDS		103 kDa		0.2	0	[]	unknown	4.1005	0	11.818	0	0	0
20	TRUE	Empty	Bifidobacterium asteroides strain wkB204, whole genome shotgun sequence	204_A_1_S_2_alpha-L-fucosidase_CDS		39 kDa		< 0.00010	INF	Glucose low, Toxin high	unknown	0	0	0	9.1626	7.7321	9.0371
207	TRUE	Empty	Bifidobacterium asteroides strain wkB204, whole genome shotgun sequence	204_A_1_S_6_rplF_CDS		19 kDa		0.069	0.7	[]	unknown	6.1507	5.1454	4.2973	3.665	3.866	4.0165
352	TRUE	Empty	Bifidobacterium asteroides strain wkB204, whole genome shotgun sequence	204_A_1_S_6_rplK_CDS		15 kDa		0.37	0	[]	unknown	3.0754	0	0	0	0	0
58	TRUE	Empty	Bifidobacterium asteroides strain wkB204, whole genome shotgun sequence	204_A_1_S_2_DUF948_domain-containing_protein_CDS		15 kDa		0.014	5.9	Glucose low, Toxin high	unknown	3.0754	0	0	6.4138	4.8326	7.0289
282	TRUE	Empty	Bifidobacterium asteroides strain wkB204, whole genome shotgun sequence	204_A_1_S_6_rpsH_CDS		15 kDa		0.03	0.3	[]	unknown	5.1256	5.1454	7.5202	2.7488	2.8995	0
353	TRUE	Empty	Bifidobacterium asteroides strain wkB204, whole genome shotgun sequence	204_A_1_S_6_rplA_CDS		25 kDa		0.0022	0	Glucose high, Toxin low	unknown	7.1759	5.1454	8.5946	0	0	0
354	TRUE	Empty	Bifidobacterium asteroides strain wkB204, whole genome shotgun sequence	204_A_1_S_3_upp_CDS		23 kDa		< 0.00010	0	Glucose high, Toxin low	unknown	6.1507	6.1744	6.4459	0	0	0
270	TRUE	Empty	Bifidobacterium asteroides strain wkB204, whole genome shotgun sequence	204_A_1_S_3_trxB_CDS		33 kDa		0.14	0.4	[]	unknown	3.0754	6.1744	7.5202	0	2.8995	4.0165
21	TRUE	Empty	Bifidobacterium asteroides strain wkB204, whole genome shotgun sequence	204_A_1_S_3_penicillin-binding_protein_CDS		81 kDa		0.016	INF	Glucose low, Toxin high	unknown	0	0	0	2.7488	6.7656	7.0289
355	TRUE	Empty	Bifidobacterium asteroides strain wkB204, whole genome shotgun sequence	204_A_1_S_6_rplJ_CDS		19 kDa		0.37	0	[]	unknown	0	0	5.3716	0	0	0
356	TRUE	Empty	Bifidobacterium asteroides strain wkB204, whole genome shotgun sequence	204_A_1_S_4_gnd_CDS		31 kDa		0.00088	0	Glucose high, Toxin low	unknown	9.2261	9.2616	6.4459	0	0	0
198	TRUE	Empty	Bifidobacterium asteroides strain wkB204, whole genome shotgun sequence	204_A_1_S_4_sugar_O-acetyltransferase_CDS		25 kDa		0.35	0.8	[]	unknown	6.1507	4.1163	4.2973	2.7488	3.866	5.0206
22	TRUE	Empty	Bifidobacterium asteroides strain wkB204, whole genome shotgun sequence	204_A_1_S_4_phenylpyruvate_tautomerase_MIF-related_protein_CDS		13 kDa		0.00058	INF	Glucose low, Toxin high	unknown	0	0	0	3.665	3.866	5.0206
357	TRUE	Empty	Bifidobacterium asteroides strain wkB204, whole genome shotgun sequence	204_A_1_S_1_phosphoribosyl-ATP_diphosphatase_CDS		10 kDa		0.0085	0	Glucose high, Toxin low	unknown	9.2261	7.2035	4.2973	0	0	0
358	TRUE	Empty	Bifidobacterium asteroides strain wkB204, whole genome shotgun sequence	204_A_1_S_1_hypothetical_protein_CDS_35		56 kDa		0.015	0	Glucose high, Toxin low	unknown	4.1005	6.1744	9.6689	0	0	0
154	TRUE	Empty	Bifidobacterium asteroides strain wkB204, whole genome shotgun sequence	204_A_1_S_3_FTR1_family_iron_permease_CDS		64 kDa		0.74	1.2	[]	unknown	4.1005	3.0872	0	3.665	1.933	3.0124
359	TRUE	Empty	Bifidobacterium asteroides strain wkB204, whole genome shotgun sequence	204_A_1_S_2_purE_CDS		17 kDa		0.16	0	[]	unknown	6.1507	3.0872	0	0	0	0
360	TRUE	Empty	Bifidobacterium asteroides strain wkB204, whole genome shotgun sequence	204_A_1_S_1_ribonuclease_J_CDS		67 kDa		< 0.00010	0	Glucose high, Toxin low	unknown	6.1507	7.2035	7.5202	0	0	0
361	TRUE	Empty	Bifidobacterium asteroides strain wkB204, whole genome shotgun sequence	204_A_1_S_2_argininosuccinate_synthase_CDS		46 kDa		0.022	0	Glucose high, Toxin low	unknown	3.0754	4.1163	7.5202	0	0	0
78	TRUE	Empty	Bifidobacterium asteroides strain wkB204, whole genome shotgun sequence	204_A_1_S_1_FHA_domain-containing_protein_CDS		16 kDa		0.13	3	[]	unknown	0	0	3.223	2.7488	2.8995	4.0165
108	TRUE	Empty	Bifidobacterium asteroides strain wkB204, whole genome shotgun sequence	204_A_1_S_4_tyrosine-protein_phosphatase_CDS		28 kDa		0.13	2	[]	unknown	3.0754	3.0872	0	3.665	3.866	5.0206
157	TRUE	Empty	Bifidobacterium asteroides strain wkB204, whole genome shotgun sequence	204_A_1_S_1_DUF881_domain-containing_protein_CDS_2		35 kDa		0.79	1.2	[]	unknown	5.1256	0	3.223	2.7488	3.866	3.0124
23	TRUE	Empty	Bifidobacterium asteroides strain wkB204, whole genome shotgun sequence	204_A_1_S_1_arsenate_reductase_family_protein_CDS		16 kDa		0.12	INF	[]	unknown	0	0	0	0	3.866	4.0165
362	TRUE	Empty	Bifidobacterium asteroides strain wkB204, whole genome shotgun sequence	204_A_1_S_2_purM_CDS		37 kDa		0.079	0	[]	unknown	13.327	3.0872	5.3716	0	0	0
24	TRUE	Empty	Bifidobacterium asteroides strain wkB204, whole genome shotgun sequence	204_A_1_S_1_murD_CDS		51 kDa		< 0.00010	INF	Glucose low, Toxin high	unknown	0	0	0	5.4976	6.7656	6.0247
107	TRUE	Empty	Bifidobacterium asteroides strain wkB204, whole genome shotgun sequence	204_A_1_S_1_amino_acid_ABC_transporter_substrate-binding_protein/permease_CDS		55 kDa		0.33	2.1	[]	unknown	0	4.1163	0	2.7488	2.8995	3.0124
363	TRUE	Empty	Bifidobacterium asteroides strain wkB204, whole genome shotgun sequence	204_A_1_S_6_ABC_transporter_substrate-binding_protein_CDS_3		59 kDa		0.12	0	[]	unknown	3.0754	4.1163	0	0	0	0
364	TRUE	Empty	Bifidobacterium asteroides strain wkB204, whole genome shotgun sequence	204_A_1_S_1_secA_CDS		110 kDa		0.0055	0	Glucose high, Toxin low	unknown	5.1256	5.1454	8.5946	0	0	0
25	TRUE	Empty	Bifidobacterium asteroides strain wkB204, whole genome shotgun sequence	204_A_1_S_2_NUDIX_hydrolase_CDS_2		23 kDa		< 0.00010	INF	Glucose low, Toxin high	unknown	0	0	0	6.4138	6.7656	6.0247
111	TRUE	Empty	Bifidobacterium asteroides strain wkB204, whole genome shotgun sequence	204_A_1_S_3_PASTA_domain-containing_protein_CDS		81 kDa		0.54	1.9	[]	unknown	4.1005	0	0	0	3.866	4.0165
312	TRUE	Empty	Bifidobacterium asteroides strain wkB204, whole genome shotgun sequence	204_A_1_S_6_rpiA_CDS		26 kDa		0.027	0.1	Glucose high, Toxin low	unknown	3.0754	6.1744	4.2973	0	0	2.0082
365	TRUE	Empty	Bifidobacterium asteroides strain wkB204, whole genome shotgun sequence	204_A_1_S_1_hisD_CDS		49 kDa		0.00042	0	Glucose high, Toxin low	unknown	4.1005	4.1163	5.3716	0	0	0
213	TRUE	Empty	Bifidobacterium asteroides strain wkB204, whole genome shotgun sequence	204_A_1_S_1_Ig-like_domain-containing_protein_CDS		192 kDa		0.68	0.7	[]	unknown	3.0754	0	6.4459	2.7488	3.866	0
366	TRUE	Empty	Bifidobacterium asteroides strain wkB204, whole genome shotgun sequence	204_A_1_S_1_D-2-hydroxyacid_dehydrogenase_CDS		37 kDa		0.37	0	[]	unknown	0	0	3.223	0	0	0
367	TRUE	Empty	Bifidobacterium asteroides strain wkB204, whole genome shotgun sequence	204_A_1_S_1_sugar_O-acetyltransferase_CDS		24 kDa		0.0018	0	Glucose high, Toxin low	unknown	4.1005	6.1744	4.2973	0	0	0
368	TRUE	Empty	Bifidobacterium asteroides strain wkB204, whole genome shotgun sequence	204_A_1_S_1_DUF3710_domain-containing_protein_CDS		29 kDa		0.18	0	[]	unknown	0	3.0872	7.5202	0	0	0
369	TRUE	Empty	Bifidobacterium asteroides strain wkB204, whole genome shotgun sequence	204_A_1_S_2_LCP_family_protein_CDS_2		53 kDa		0.016	0	Glucose high, Toxin low	unknown	7.1759	4.1163	3.223	0	0	0
370	TRUE	Empty	Bifidobacterium asteroides strain wkB204, whole genome shotgun sequence	204_A_1_S_2_ychF_CDS		40 kDa		< 0.00010	0	Glucose high, Toxin low	unknown	6.1507	6.1744	6.4459	0	0	0
371	TRUE	Empty	Bifidobacterium asteroides strain wkB204, whole genome shotgun sequence	204_A_1_S_6_3-deoxy-7-phosphoheptulonate_synthase_CDS		42 kDa		0.0033	0	Glucose high, Toxin low	unknown	7.1759	4.1163	5.3716	0	0	0
253	TRUE	Empty	Bifidobacterium asteroides strain wkB204, whole genome shotgun sequence	204_A_1_S_4_NAD(P)H-binding_protein_CDS		24 kDa		0.12	0.5	[]	unknown	4.1005	4.1163	3.223	2.7488	2.8995	0
372	TRUE	Empty	Bifidobacterium asteroides strain wkB204, whole genome shotgun sequence	204_A_1_S_2_Nif3-like_dinuclear_metal_center_hexameric_protein_CDS		34 kDa		0.0018	0	Glucose high, Toxin low	unknown	4.1005	6.1744	4.2973	0	0	0
183	TRUE	Empty	Bifidobacterium asteroides strain wkB204, whole genome shotgun sequence	204_A_1_S_2_LytR_C-terminal_domain-containing_protein_CDS		22 kDa		0.96	0.9	[]	unknown	0	0	3.223	0	0	3.0124
26	TRUE	Empty	Bifidobacterium asteroides strain wkB204, whole genome shotgun sequence	204_A_1_S_1_dtd_CDS		18 kDa		0.0009	INF	Glucose low, Toxin high	unknown	0	0	0	2.7488	3.866	4.0165
373	TRUE	Empty	Bifidobacterium asteroides strain wkB204, whole genome shotgun sequence	204_A_1_S_1_NADH:flavin_oxidoreductase/NADH_oxidase_CDS		49 kDa		0.00042	0	Glucose high, Toxin low	unknown	4.1005	4.1163	5.3716	0	0	0
374	TRUE	Empty	Bifidobacterium asteroides strain wkB204, whole genome shotgun sequence	204_A_1_S_2_thrS_CDS		78 kDa		0.22	0	[]	unknown	7.1759	0	2.1486	0	0	0
27	TRUE	Empty	Bifidobacterium asteroides strain wkB204, whole genome shotgun sequence	204_A_1_S_6_rpsS_CDS		11 kDa		0.12	INF	[]	unknown	0	0	0	3.665	2.8995	0
375	TRUE	Empty	Bifidobacterium asteroides strain wkB204, whole genome shotgun sequence	204_A_1_S_3_FtsX-like_permease_family_protein_CDS		41 kDa		0.0082	0	Glucose high, Toxin low	unknown	6.1507	3.0872	6.4459	0	0	0
86	TRUE	Empty	Bifidobacterium asteroides strain wkB204, whole genome shotgun sequence	204_A_1_S_3_DUF2318_domain-containing_protein_CDS		45 kDa		0.17	2.7	[]	unknown	0	0	4.2973	3.665	3.866	4.0165
376	TRUE	Empty	Bifidobacterium asteroides strain wkB204, whole genome shotgun sequence	204_A_1_S_6_rplC_CDS		23 kDa		0.12	0	[]	unknown	5.1256	4.1163	0	0	0	0
28	TRUE	Empty	Bifidobacterium asteroides strain wkB204, whole genome shotgun sequence	204_A_1_S_3_aldo/keto_reductase_CDS_2		37 kDa		0.00018	INF	Glucose low, Toxin high	unknown	0	0	0	4.5813	3.866	5.0206
377	TRUE	Empty	Bifidobacterium asteroides strain wkB204, whole genome shotgun sequence	204_A_1_S_2_sufB_CDS		54 kDa		0.00022	0	Glucose high, Toxin low	unknown	5.1256	4.1163	5.3716	0	0	0
378	TRUE	Empty	Bifidobacterium asteroides strain wkB204, whole genome shotgun sequence	204_A_1_S_6_homoserine_dehydrogenase_CDS		47 kDa		0.00042	0	Glucose high, Toxin low	unknown	4.1005	4.1163	5.3716	0	0	0
379	TRUE	Empty	Bifidobacterium asteroides strain wkB204, whole genome shotgun sequence	204_A_1_S_3_aldo/keto_reductase_CDS		33 kDa		0.0017	0	Glucose high, Toxin low	unknown	6.1507	4.1163	4.2973	0	0	0
380	TRUE	Empty	SWISS-PROT:Q86YZ3 Tax_Id=9606 Gene_Symbol=HRNR Hornerin	Q86YZ3		282 kDa		0.22	0	[]	unknown	14.352	4.1163	0	0	0	0
63	TRUE	Empty	Bifidobacterium asteroides strain wkB204, whole genome shotgun sequence	204_A_1_S_8_ABC_transporter_ATP-binding_protein/permease_CDS_2		102 kDa		0.23	4.6	[]	unknown	2.0502	0	0	4.5813	4.8326	0
381	TRUE	Empty	Bifidobacterium asteroides strain wkB204, whole genome shotgun sequence	204_A_1_S_3_valS_CDS		103 kDa		0.017	0	Glucose high, Toxin low	unknown	2.0502	5.1454	5.3716	0	0	0
29	TRUE	Empty	Bifidobacterium asteroides strain wkB204, whole genome shotgun sequence	204_A_1_S_4_DUF2961_domain-containing_protein_CDS		42 kDa		0.0039	INF	Glucose low, Toxin high	unknown	0	0	0	5.4976	4.8326	3.0124
30	TRUE	Empty	Bifidobacterium asteroides strain wkB204, whole genome shotgun sequence	204_A_1_S_5_DUF3073_domain-containing_protein_CDS		14 kDa		0.00075	INF	Glucose low, Toxin high	unknown	0	0	0	5.4976	5.7991	4.0165
382	TRUE	Empty	Bifidobacterium asteroides strain wkB204, whole genome shotgun sequence	204_A_1_S_2_sugar_ABC_transporter_substrate-binding_protein_CDS		46 kDa		0.12	0	[]	unknown	6.1507	5.1454	0	0	0	0
201	TRUE	Empty	Bifidobacterium asteroides strain wkB204, whole genome shotgun sequence	204_A_1_S_2_dihydroorotate_dehydrogenase_CDS		34 kDa		0.75	0.8	[]	unknown	0	3.0872	4.2973	2.7488	0	3.0124
31	TRUE	Empty	Bifidobacterium asteroides strain wkB204, whole genome shotgun sequence	204_A_1_S_1_hypothetical_protein_CDS_7		7 kDa		0.00058	INF	Glucose low, Toxin high	unknown	0	0	0	3.665	3.866	5.0206
383	TRUE	Empty	Bifidobacterium asteroides strain wkB204, whole genome shotgun sequence	204_A_1_S_6_hpt_CDS		23 kDa		0.12	0	[]	unknown	5.1256	0	5.3716	0	0	0
281	TRUE	Empty	Bifidobacterium asteroides strain wkB204, whole genome shotgun sequence	204_A_1_S_1_cell_division_protein_SepF_CDS		17 kDa		0.1	0.3	[]	unknown	4.1005	4.1163	4.2973	0	0	4.0165
384	TRUE	Empty	Bifidobacterium asteroides strain wkB204, whole genome shotgun sequence	204_A_1_S_3_DUF6049_family_protein_CDS		79 kDa		0.016	0	Glucose high, Toxin low	unknown	7.1759	3.0872	4.2973	0	0	0
32	TRUE	Empty	Bifidobacterium asteroides strain wkB204, whole genome shotgun sequence	204_A_1_S_5_ketopantoate_reductase_family_protein_CDS		37 kDa		0.023	INF	Glucose low, Toxin high	unknown	0	0	0	7.3301	3.866	3.0124
385	TRUE	Empty	Bifidobacterium asteroides strain wkB204, whole genome shotgun sequence	204_A_1_S_2_fructosamine_kinase_family_protein_CDS		29 kDa		0.37	0	[]	unknown	0	5.1454	0	0	0	0
386	TRUE	Empty	Bifidobacterium asteroides strain wkB204, whole genome shotgun sequence	204_A_1_S_6_rplW_CDS		11 kDa		0.00015	0	Glucose high, Toxin low	unknown	4.1005	5.1454	4.2973	0	0	0
33	TRUE	Empty	Bifidobacterium asteroides strain wkB204, whole genome shotgun sequence	204_A_1_S_>_hypothetical_protein_CDS		10 kDa		0.0053	INF	Glucose low, Toxin high	unknown	0	0	0	5.4976	2.8995	4.0165
387	TRUE	Empty	Bifidobacterium asteroides strain wkB204, whole genome shotgun sequence	204_A_1_S_1_DivIVA_domain-containing_protein_CDS_2		61 kDa		0.14	0	[]	unknown	3.0754	0	5.3716	0	0	0
34	TRUE	Empty	Bifidobacterium asteroides strain wkB204, whole genome shotgun sequence	204_A_1_S_4_cell_division_protein_CDS		25 kDa		0.12	INF	[]	unknown	0	0	0	3.665	4.8326	0
193	TRUE	Empty	Bifidobacterium asteroides strain wkB204, whole genome shotgun sequence	204_A_1_S_6_rplM_CDS		17 kDa		0.92	0.9	[]	unknown	0	0	3.223	2.7488	0	0
388	TRUE	Empty	Bifidobacterium asteroides strain wkB204, whole genome shotgun sequence	204_A_1_S_6_rpsI_CDS		17 kDa		0.37	0	[]	unknown	0	0	4.2973	0	0	0
35	TRUE	Empty	Bifidobacterium asteroides strain wkB204, whole genome shotgun sequence	204_A_1_S_1_ABC_transporter_substrate-binding_protein_CDS		35 kDa		0.00017	INF	Glucose low, Toxin high	unknown	0	0	0	3.665	3.866	3.0124
389	TRUE	Empty	Bifidobacterium asteroides strain wkB204, whole genome shotgun sequence	204_A_1_S_2_rpsD_CDS		24 kDa		0.12	0	[]	unknown	3.0754	4.1163	0	0	0	0
390	TRUE	Empty	Bifidobacterium asteroides strain wkB204, whole genome shotgun sequence	204_A_1_S_4_hypothetical_protein_CDS_5		31 kDa		0.00052	0	Glucose high, Toxin low	unknown	4.1005	3.0872	4.2973	0	0	0
391	TRUE	Empty	Bifidobacterium asteroides strain wkB204, whole genome shotgun sequence	204_A_1_S_2_response_regulator_CDS		23 kDa		0.13	0	[]	unknown	3.0754	0	4.2973	0	0	0
392	TRUE	Empty	Protein MMF1, mitochondrial OS=Saccharomyces cerevisiae (strain ATCC 204508 / S288c) OX=559292 GN=MMF1 PE=1 SV=1	P40185	MMF1	16 kDa		0.001	0	Glucose high, Toxin low	unknown	3.0754	3.0872	4.2973	0	0	0
393	TRUE	Empty	Bifidobacterium asteroides strain wkB204, whole genome shotgun sequence	204_A_1_S_4_yicI_CDS		77 kDa		0.12	0	[]	unknown	0	3.0872	3.223	0	0	0
394	TRUE	Empty	Bifidobacterium asteroides strain wkB204, whole genome shotgun sequence	204_A_1_S_2_purD_CDS		45 kDa		0.00055	0	Glucose high, Toxin low	unknown	3.0754	4.1163	4.2973	0	0	0
395	TRUE	Empty	Bifidobacterium asteroides strain wkB204, whole genome shotgun sequence	204_A_1_S_6_rplP_CDS		15 kDa		0.37	0	[]	unknown	0	3.0872	0	0	0	0
396	TRUE	Empty	Bifidobacterium asteroides strain wkB204, whole genome shotgun sequence	204_A_1_S_2_guaA_CDS		56 kDa		0.12	0	[]	unknown	4.1005	0	3.223	0	0	0
397	TRUE	Empty	Bifidobacterium asteroides strain wkB204, whole genome shotgun sequence	204_A_1_S_1_histidine_phosphatase_family_protein_CDS		27 kDa		0.12	0	[]	unknown	3.0754	3.0872	0	0	0	0
398	TRUE	Empty	Bifidobacterium asteroides strain wkB204, whole genome shotgun sequence	204_A_1_S_1_GuaB3_family_IMP_dehydrogenase-related_protein_CDS		40 kDa		< 0.00010	0	Glucose high, Toxin low	unknown	4.1005	4.1163	4.2973	0	0	0
36	TRUE	Empty	Bifidobacterium asteroides strain wkB204, whole genome shotgun sequence	204_A_1_S_2_PH_domain-containing_protein_CDS		13 kDa		0.00027	INF	Glucose low, Toxin high	unknown	0	0	0	3.665	4.8326	4.0165
399	TRUE	Empty	Bifidobacterium asteroides strain wkB204, whole genome shotgun sequence	204_A_1_S_2_methyltransferase_CDS		24 kDa		0.37	0	[]	unknown	0	4.1163	0	0	0	0
400	TRUE	Empty	Bifidobacterium asteroides strain wkB204, whole genome shotgun sequence	204_A_1_S_6_rpsM_CDS		14 kDa		0.37	0	[]	unknown	0	0	4.2973	0	0	0
401	TRUE	Empty	Bifidobacterium asteroides strain wkB204, whole genome shotgun sequence	204_A_1_S_5_FHA_domain-containing_protein_CDS		19 kDa		0.0018	0	Glucose high, Toxin low	unknown	2.0502	3.0872	2.1486	0	0	0
262	TRUE	Empty	Bifidobacterium asteroides strain wkB204, whole genome shotgun sequence	204_A_1_S_1_penicillin-binding_protein_CDS		83 kDa		0.45	0.4	[]	unknown	3.0754	3.0872	0	2.7488	0	0
402	TRUE	Empty	Bifidobacterium asteroides strain wkB204, whole genome shotgun sequence	204_A_1_S_2_D-2-hydroxyacid_dehydrogenase_CDS		36 kDa		0.0061	0	Glucose high, Toxin low	unknown	4.1005	2.0581	3.223	0	0	0
37	TRUE	Empty	Bifidobacterium asteroides strain wkB204, whole genome shotgun sequence	204_A_1_S_1_PASTA_domain-containing_protein_CDS		80 kDa		0.0013	INF	Glucose low, Toxin high	unknown	0	0	0	2.7488	2.8995	4.0165
218	TRUE	Empty	Bifidobacterium asteroides strain wkB204, whole genome shotgun sequence	204_A_1_S_3_ABC_transporter_permease_CDS_3		47 kDa		0.8	0.7	[]	unknown	0	4.1163	0	2.7488	0	0
403	TRUE	Empty	Bifidobacterium asteroides strain wkB204, whole genome shotgun sequence	204_A_1_S_4_ATP-binding_cassette_domain-containing_protein_CDS		38 kDa		0.00055	0	Glucose high, Toxin low	unknown	3.0754	4.1163	4.2973	0	0	0
404	TRUE	Empty	Bifidobacterium asteroides strain wkB204, whole genome shotgun sequence	204_A_1_S_4_zwf_CDS		55 kDa		0.12	0	[]	unknown	0	4.1163	5.3716	0	0	0
405	TRUE	Empty	Bifidobacterium asteroides strain wkB204, whole genome shotgun sequence	204_A_1_S_4_grpE_CDS		26 kDa		0.13	0	[]	unknown	6.1507	4.1163	0	0	0	0
406	TRUE	Empty	Bifidobacterium asteroides strain wkB204, whole genome shotgun sequence	204_A_1_S_6_rpsK_CDS		14 kDa		0.37	0	[]	unknown	0	3.0872	0	0	0	0
38	TRUE	Empty	Bifidobacterium asteroides strain wkB204, whole genome shotgun sequence	204_A_1_S_1_histidinol-phosphate_transaminase_CDS		42 kDa		0.12	INF	[]	unknown	0	0	0	0	2.8995	3.0124
407	TRUE	Empty	Bifidobacterium asteroides strain wkB204, whole genome shotgun sequence	204_A_1_S_3_class_I_SAM-dependent_methyltransferase_CDS		49 kDa		0.00052	0	Glucose high, Toxin low	unknown	4.1005	3.0872	4.2973	0	0	0
408	TRUE	Empty	Bifidobacterium asteroides strain wkB204, whole genome shotgun sequence	204_A_1_S_1_glnA_CDS		50 kDa		0.12	0	[]	unknown	0	4.1163	4.2973	0	0	0
409	TRUE	Empty	SWISS-PROT:Q9U6Y5 Green fluorescent protein (GFP-Cter-HisTag)	Q9U6Y5		28 kDa		0.37	0	[]	unknown	10.251	0	0	0	0	0
410	TRUE	Empty	Bifidobacterium asteroides strain wkB204, whole genome shotgun sequence	204_A_1_S_1_chorismate_mutase_CDS		35 kDa		0.37	0	[]	unknown	3.0754	0	0	0	0	0
411	TRUE	Empty	Bifidobacterium asteroides strain wkB204, whole genome shotgun sequence	204_A_1_S_6_3-deoxy-7-phosphoheptulonate_synthase_CDS_2		45 kDa		0.37	0	[]	unknown	3.0754	0	0	0	0	0
412	TRUE	Empty	Bifidobacterium asteroides strain wkB204, whole genome shotgun sequence	204_A_1_S_3_dnaN_CDS		41 kDa		0.13	0	[]	unknown	3.0754	0	4.2973	0	0	0
39	TRUE	Empty	Bifidobacterium asteroides strain wkB204, whole genome shotgun sequence	204_A_1_S_2_1-deoxy-D-xylulose-5-phosphate_synthase_CDS		67 kDa		0.37	INF	[]	unknown	0	0	0	0	0	6.0247
40	TRUE	Empty	Bifidobacterium asteroides strain wkB204, whole genome shotgun sequence	204_A_1_S_8_FtsX-like_permease_family_protein_CDS		127 kDa		0.13	INF	[]	unknown	0	0	0	0	3.866	6.0247
41	TRUE	Empty	Bifidobacterium asteroides strain wkB204, whole genome shotgun sequence	204_A_1_S_6_thioesterase_family_protein_CDS		34 kDa		0.37	INF	[]	unknown	0	0	0	3.665	0	0
413	TRUE	Empty	Bifidobacterium asteroides strain wkB204, whole genome shotgun sequence	204_A_1_S_6_infB_CDS		99 kDa		0.37	0	[]	unknown	0	3.0872	0	0	0	0
42	TRUE	Empty	Bifidobacterium asteroides strain wkB204, whole genome shotgun sequence	204_A_1_S_6_rplO_CDS		16 kDa		0.12	INF	[]	unknown	0	0	0	2.7488	0	3.0124
414	TRUE	Empty	Bifidobacterium asteroides strain wkB204, whole genome shotgun sequence	204_A_1_S_3_RNA_degradosome_polyphosphate_kinase_CDS		84 kDa		0.37	0	[]	unknown	0	0	3.223	0	0	0
187	TRUE	Empty	Bifidobacterium asteroides strain wkB204, whole genome shotgun sequence	204_A_1_S_6_rpmA_CDS		9 kDa		0.94	0.9	[]	unknown	3.0754	0	0	2.7488	0	0
43	TRUE	Empty	Bifidobacterium asteroides strain wkB204, whole genome shotgun sequence	204_A_1_S_6_metA_CDS		40 kDa		0.004	INF	Glucose low, Toxin high	unknown	0	0	0	3.665	2.8995	2.0082
44	TRUE	Empty	Bifidobacterium asteroides strain wkB204, whole genome shotgun sequence	204_A_1_S_1_MFS_transporter_CDS_6		47 kDa		< 0.00010	INF	Glucose low, Toxin high	unknown	0	0	0	2.7488	2.8995	3.0124
415	TRUE	Empty	Bifidobacterium asteroides strain wkB204, whole genome shotgun sequence	204_A_1_S_1_aspS_CDS		67 kDa		0.37	0	[]	unknown	0	3.0872	0	0	0	0
416	TRUE	Empty	Bifidobacterium asteroides strain wkB204, whole genome shotgun sequence	204_A_1_S_6_lysS_CDS		61 kDa		0.37	0	[]	unknown	0	0	4.2973	0	0	0
417	TRUE	Empty	Bifidobacterium asteroides strain wkB204, whole genome shotgun sequence	204_A_1_S_6_rplN_CDS		13 kDa		0.13	0	[]	unknown	0	3.0872	2.1486	0	0	0
418	TRUE	Empty	Bifidobacterium asteroides strain wkB204, whole genome shotgun sequence	204_A_1_S_1_nudC_CDS		38 kDa		0.37	0	[]	unknown	0	0	3.223	0	0	0
45	TRUE	Empty	Bifidobacterium asteroides strain wkB204, whole genome shotgun sequence	204_A_1_S_6_F0F1_ATP_synthase_subunit_epsilon_CDS		10 kDa		0.37	INF	[]	unknown	0	0	0	3.665	0	0
419	TRUE	Empty	Bifidobacterium asteroides strain wkB204, whole genome shotgun sequence	204_A_1_S_6_pyroglutamyl-peptidase_I_CDS		26 kDa		0.37	0	[]	unknown	3.0754	0	0	0	0	0
46	TRUE	Empty	Bifidobacterium asteroides strain wkB204, whole genome shotgun sequence	204_A_1_S_3_ABC_transporter_substrate-binding_protein_CDS_3		57 kDa		0.37	INF	[]	unknown	0	0	0	2.7488	0	0
420	TRUE	Empty	Bifidobacterium asteroides strain wkB204, whole genome shotgun sequence	204_A_1_S_1_PD-(D/E)XK_nuclease_family_protein_CDS		168 kDa		0.37	0	[]	unknown	0	0	5.3716	0	0	0
47	TRUE	Empty	Bifidobacterium asteroides strain wkB204, whole genome shotgun sequence	204_A_1_S_1_FGGY-family_carbohydrate_kinase_CDS		58 kDa		0.37	INF	[]	unknown	0	0	0	0	1.933	0
421	TRUE	Empty	Bifidobacterium asteroides strain wkB204, whole genome shotgun sequence	204_A_1_S_2_YebC/PmpR_family_DNA-binding_transcriptional_regulator_CDS		27 kDa		0.37	0	[]	unknown	0	0	2.1486	0	0	0
422	TRUE	Empty	Bifidobacterium asteroides strain wkB204, whole genome shotgun sequence	204_A_1_S_1_DUF4981_domain-containing_protein_CDS		122 kDa		0.37	0	[]	unknown	0	0	3.223	0	0	0
423	TRUE	Empty	Bifidobacterium asteroides strain wkB204, whole genome shotgun sequence	204_A_1_S_1_ABC_transporter_ATP-binding_protein_CDS_2		73 kDa		0.14	0	[]	unknown	0	2.0581	3.223	0	0	0
424	TRUE	Empty	Bifidobacterium asteroides strain wkB204, whole genome shotgun sequence	204_A_1_S_1_GTP_pyrophosphokinase_family_protein_CDS		27 kDa		0.37	0	[]	unknown	3.0754	0	0	0	0	0
425	TRUE	Empty	Aspartyl aminopeptidase 4 OS=Saccharomyces cerevisiae (strain ATCC 204508 / S288c) OX=559292 GN=APE4 PE=1 SV=1	P38821	APE4	54 kDa		0.37	0	[]	unknown	3.0754	0	0	0	0	0
426	TRUE	Empty	Bifidobacterium asteroides strain wkB204, whole genome shotgun sequence	204_A_1_S_5_trpS_CDS		40 kDa		0.37	0	[]	unknown	0	2.0581	0	0	0	0
427	TRUE	Empty	Bifidobacterium asteroides strain wkB204, whole genome shotgun sequence	204_A_1_S_2_alaS_CDS		98 kDa		0.37	0	[]	unknown	0	3.0872	0	0	0	0
48	TRUE	Empty	Bifidobacterium asteroides strain wkB204, whole genome shotgun sequence	204_A_1_S_2_hypothetical_protein_CDS_40		32 kDa		0.37	INF	[]	unknown	0	0	0	3.665	0	0
428	TRUE	Empty	Bifidobacterium asteroides strain wkB204, whole genome shotgun sequence	204_A_1_S_2_NAD(P)(+)_transhydrogenase_(Re/Si-specific)_subunit_beta_CDS		47 kDa		0.37	0	[]	unknown	0	0	2.1486	0	0	0
429	TRUE	Empty	Bifidobacterium asteroides strain wkB204, whole genome shotgun sequence	204_A_1_S_2_nitrate/sulfonate/bicarbonate_ABC_transporter_ATP-binding_protein_CDS		51 kDa		0.37	0	[]	unknown	0	0	3.223	0	0	0
49	TRUE	Empty	Bifidobacterium asteroides strain wkB204, whole genome shotgun sequence	204_A_1_S_2_NAD-dependent_succinate-semialdehyde_dehydrogenase_CDS_2		53 kDa		0.37	INF	[]	unknown	0	0	0	2.7488	0	0
430	TRUE	Empty	Bifidobacterium asteroides strain wkB204, whole genome shotgun sequence	204_A_1_S_3_topA_CDS		105 kDa		0.37	0	[]	unknown	0	0	3.223	0	0	0
50	TRUE	Empty	Bifidobacterium asteroides strain wkB204, whole genome shotgun sequence	204_A_1_S_1_amino_acid_ABC_transporter_permease_CDS		43 kDa		0.37	INF	[]	unknown	0	0	0	2.7488	0	0
431	TRUE	Empty	Bifidobacterium asteroides strain wkB204, whole genome shotgun sequence	204_A_1_S_2_purT_CDS		46 kDa		0.37	0	[]	unknown	0	0	2.1486	0	0	0
432	TRUE	Empty	Bifidobacterium asteroides strain wkB204, whole genome shotgun sequence	204_A_1_S_3_murein_biosynthesis_integral_membrane_protein_MurJ_CDS		152 kDa		0.37	0	[]	unknown	0	2.0581	0	0	0	0
51	TRUE	Empty	Bifidobacterium asteroides strain wkB204, whole genome shotgun sequence	204_A_1_S_6_Hsp20/alpha_crystallin_family_protein_CDS		17 kDa		0.37	INF	[]	unknown	0	0	0	1.8325	0	0
END OF FILE
