# Supplementary material for: Host-microbiome metabolism of a plant toxin in bees
Source: eLife. 2022 Dec 6;11:e82595. doi: 10.7554/eLife.82595 (PMC9897726; doi:10.7554/eLife.82595)
Supplement: Figure 5—source data 1. [file elife-82595-fig5-data1.xlsx]

## Sheet: wkB204
Figure 5 - source data 1
dbCAN metaserver results for Bifidobacterium strains wkB204, wkB344, and wkB338
dbCAN metaserver results for Bifidobacterium strain wkB204
Gene ID	EC#	HMMER	dbCAN_sub	DIAMOND	Signalp	#ofTools
WP_045935657.1	-	GT2(5-135)	GT2	GT2	N	3
WP_046323603.1	-	GT39(2-300)	GT39_e1	GT39	N	3
WP_110413274.1	-	GT2(45-271)	GT2	GT2	N	3
WP_211120531.1	-	GH36(63-606)	GH36_e14	GH36	N	3
WP_211120860.1	3.2.1.20	GH13_30(33-402)	GH13_e234	GH13_30	N	3
WP_254476883.1	-	GT51(78-265)	GT51_e11	GT51	N	3
WP_254476885.1	-	GT2(12-177)	GT2	GT2	N	3
WP_254476923.1	3.2.1.185	GH146(33-572)	GH146_e0	GH146	N	3
WP_254476931.1	3.2.1.185	GH127(18-610)	GH127_e0	GH127	N	3
WP_254476932.1	-	GH3(677-877)	GH3_e130	GH3	N	3
WP_254476944.1	3.2.1.21	GH3(76-307)	GH3_e91	GH3	N	3
WP_254476960.1	3.2.1.26	GH32(39-335)	GH32_e28	GH32	N	3
WP_254476991.1	-	GH146(195-711)	GH146_e8	GH146	N	3
WP_254477001.1	3.2.1.52	GH20(147-461)	GH20_e24	GH20	N	3
WP_254477003.1	-	GH3(685-927)	GH3_e33	GH3	N	3
WP_254477004.1	-	GH2(5-561)	GH2_e95	GH2	N	3
WP_254477012.1	3.2.1.24	GH38(276-526)	GH38_e38	GH38	N	3
WP_254477015.1	3.2.1.25	GH5_18(15-298)	GH5_e224	GH5_18	N	3
WP_254477018.1	-	CE1(107-336)	CE1_e22	N	Y(1-26)	2
WP_254477019.1	-	GH3(667-880)	GH3_e130	GH3	Y(1-31)	3
WP_254477090.1	-	GH109(17-171)	GH109_e7	N	N	2
WP_254477120.1	-	GH146(214-740)	GH146_e8	GH146	N	3
WP_254477132.1	3.2.1.55	GH51(10-510)	GH51_e0	GH51	N	3
WP_254477160.1	3.2.1.37	GH30_2(22-433)	GH30_e60	GH30_2	N	3
WP_254477161.1	3.2.1.-	GH42(1-364)	GH42_e0	GH42	N	3
WP_254477167.1	-	GT28(214-386)	GT28_e141	GT28	N	3
WP_254477172.1	3.2.1.23|3.2.1.31	GH2(39-969)	GH2_e104	GH2	N	3
WP_254477210.1	3.2.1.23	GH42(26-397)	GH42_e28	GH42	N	3
WP_254477220.1	3.2.1.185	GH127(17-578)	GH127_e0	GH127	N	3
WP_254477240.1	N	CE1(193-429)	N	N	N	1
WP_254477250.1	-	GT4(204-343)	GT4_e207	GT4	N	3
WP_254477303.1	-	GT2(14-156)	GT2	GT2	N	3
WP_254477308.1	3.2.1.21|3.2.1.-|3.2.1.37|3.2.1.55|3.2.1.23|3.2.1.45	GH3(36-247)	GH3_e197	GH3	N	3
WP_254477314.1	3.2.1.40|3.1.1.73	CBM67(102-265)+GH78(310-838)	CBM67_e28+GH78_e80	GH78	N	3
WP_254477316.1	-	GH3(735-920)	GH3_e33	GH3	Y(1-30)	3
WP_254477336.1	-	GH109(23-168)	GH109_e7	N	N	2
WP_254477348.1	-	AA7(61-250)	AA4_e1	N	N	2
WP_254477357.1	-	GT1(25-235)	GT1_e7	N	N	2
WP_254477384.1	-	GT4(199-352)	GT4_e3355	GT4	N	3
WP_254477430.1	3.2.1.51	GH29(3-336)	GH29_e88	GH29	N	3
WP_254477508.1	-	GT4(212-361)	GT4_e2883	GT4	N	3
WP_254477624.1	-	GH3(674-875)	GH3_e130	GH3	N	3
WP_254477626.1	3.2.1.21|3.2.1.-|3.2.1.37|3.2.1.55|3.2.1.23|3.2.1.45	GH3(26-244)	GH3_e197	GH3	N	3
WP_254477630.1	-	GT2(16-148)	GT2	GT2	N	3
WP_254477705.1	3.2.1.21	GH1(6-386)	GH1_e38	GH1	N	3
WP_254477707.1	2.4.1.7	GH13_18(35-379)	GH13_e144	GH13_18	N	3
WP_254477720.1	2.4.1.211	GH112(5-719)	GH112_e0	GH112	N	3
WP_254477726.1	3.2.1.97	GH101(2-725)	GH101_e0	CBM32+GH101	N	3
WP_254477738.1	-	GH32(34-332)	GH32_e38	GH32	N	3
WP_254477776.1	-	GH32(11-291)	GH32_e121	GH32	N	3
WP_254477853.1	-	GT51(105-277)	GT51_e89	GT51	N	3
WP_254477857.1	3.2.1.55	GH51(2-504)	GH51_e1	GH51	N	3
WP_254477941.1	3.2.1.40|3.1.1.73	CBM67(143-310)+GH78(338-866)	CBM67_e28+GH78_e80	GH78	N	3
WP_254478044.1	-	GT111(14-252)+GT8(281-551)	GT111_e16+GT8_e174	GT111+GT8	N	3
WP_254478046.1	-	GT2(5-146)+GT111(388-626)+GT8(662-928)	GT2+GT111_e16+GT8_e174	GT111+GT2+GT8	N	3
WP_254478057.1	-	GT2(48-215)	GT2	GT2	N	3
WP_254478059.1	-	GH25(216-401)+CBM13(435-525)	GH25_e221+CBM13_e31+CBM13_e31	CBM13+GH25	Y(1-30)	3
WP_254478106.1	-	GH43_34(22-287)	GH43_e120	GH43_34	N	3
WP_254478111.1	3.2.1.37	GH43_22(61-300)	GH43_e201	GH43_22	N	3
WP_254478116.1	2.4.1.64	GH65(577-947)	GH65_e2	GH65	N	3
WP_254478124.1	3.2.1.21|3.2.1.-|3.2.1.38|3.2.1.23|3.2.1.74	GH1(8-462)	GH1_e113	GH1	N	3
WP_254478126.1	-	GH3(714-939)	GH3_e130	GH3	N	3
WP_254478129.1	3.2.1.177	GH31(240-673)	GH31_e31	GH31	N	3
WP_254478130.1	3.2.1.21	GH1(14-422)	GH1_e111	GH1	N	3
WP_254478132.1	3.2.1.40|3.1.1.73	CBM67(72-215)+GH78(257-776)	CBM67_e28+GH78_e80	GH78	N	3
WP_254478173.1	2.4.1.15	GT20(2-265)+GT20(321-520)	GT20_e1+GT20_e1	GT20	N	3
WP_254478174.1	5.4.99.11|3.2.1.20|3.2.1.10|3.2.1.-|3.2.1.70	GH13_31(46-412)	GH13_e122	GH13_31	N	3
WP_254478182.1	3.2.1.22	GH36(27-696)	GH36_e2	GH36	N	3
WP_254478203.1	-	CE9(27-430)	CE9_e95	CE9	N	3
WP_254478311.1	3.2.1.55	GH2(6-446)	GH2_e73	GH2	N	3
WP_254478363.1	-	GH3(2-176)	GH3_e99	GH3	N	3
WP_254478405.1	3.2.1.22	GH36(55-655)	GH36_e2	GH36	N	3
WP_254477397.1	-	N	GT2	GT0	N	2
WP_254476980.1	-	N	CBM50_e252	N	Y(1-24)	1
WP_254477011.1	3.2.1.96|3.2.1.-	N	GH18_e215	GH18	Y(1-25)	2
WP_110412465.1	-	N	GH23_e447	GH23	N	2
WP_254477335.1	-	N	GT1_e7	N	N	1
WP_254478160.1	-	N	GT2	GT2	N	2
WP_254477007.1	3.2.1.96|3.2.1.-	N	GH18_e215	GH18	N	2
WP_254477675.1	-	N	GH23_e314	GH23	N	2
WP_254478403.1	-	N	GH36_e69	GH36	N	2
WP_015021986.1	N	N	N	GH13_31	N	1
WP_015022107.1	N	N	N	GH13	N	1
WP_110413173.1	N	N	N	GH38	N	1
WP_220236364.1	N	N	N	GT58	N	1
WP_254476891.1	N	N	N	GH16	N	1
WP_254476893.1	N	N	N	GH1	N	1
WP_254476969.1	N	N	N	GH13_30	N	1
WP_254477057.1	N	N	N	GT2	N	1
WP_254477107.1	N	N	N	GH13_11	N	1
WP_254477124.1	N	N	N	GT4	N	1
WP_254477179.1	N	N	N	GT83	N	1
WP_254477198.1	N	N	N	CBM50+GH25	N	1
WP_254477295.1	N	N	N	GT4	N	1
WP_254477471.1	N	N	N	GH28	N	1
WP_254477505.1	N	N	N	GH28	N	1
WP_254477699.1	N	N	N	GT47	N	1
WP_254477792.1	N	N	N	CBM50	N	1
WP_254477890.1	N	N	N	GT4	N	1
WP_254478045.1	N	N	N	GT4	N	1
WP_254478187.1	N	N	N	CBM50	N	1
WP_254478214.1	N	N	N	CBM50	N	1
WP_254478269.1	N	N	N	GH101	N	1
WP_254478318.1	N	N	N	GT2	N	1
WP_254478324.1	N	N	N	CBM48+GH13_9	N	1

## Sheet: wkB344
dbCAN metaserver results for Bifidobacterium strain wkB344
Gene ID	EC#	HMMER	dbCAN_sub	DIAMOND	Signalp	#ofTools
WP_024626710.1	-	GT2(45-271)	GT2	GT2	N	3
WP_024627813.1	3.2.1.20	GH13_30(33-402)	GH13_e234	GH13_30	N	3
WP_024628108.1	-	GH32(11-291)	GH32_e121	GH32	N	3
WP_121913877.1	3.2.1.22	GH36(55-655)	GH36_e2	GH36	N	3
WP_121913907.1	-	CE9(27-430)	CE9_e95	CE9	N	3
WP_121913917.1	5.4.99.11|3.2.1.20|3.2.1.10|3.2.1.-|3.2.1.70	GH13_31(46-412)	GH13_e122	GH13_31	N	3
WP_121913922.1	-	GH36(80-490)	GH36_e14	GH36	N	3
WP_121913939.1	-	GH43_34(20-287)	GH43_e120	GH43_34	N	3
WP_121913946.1	3.2.1.37	GH43_22(61-282)	GH43_e201	GH43_22	N	3
WP_121913947.1	2.4.1.64	GH65(577-947)	GH65_e2	GH65	N	3
WP_121913951.1	3.2.1.21|3.2.1.-|3.2.1.38|3.2.1.23|3.2.1.74	GH1(8-462)	GH1_e113	GH1	N	3
WP_121913968.1	-	GH3(677-877)	GH3_e130	GH3	N	3
WP_121913979.1	3.2.1.21	GH3(76-307)	GH3_e91	GH3	N	3
WP_121913995.1	3.2.1.26	GH32(39-335)	GH32_e28	GH32	N	3
WP_121914035.1	-	GH2(4-561)	GH2_e95	GH2	N	3
WP_121914037.1	3.2.1.24	GH38(276-526)	GH38_e38	GH38	N	3
WP_121914038.1	3.2.1.25	GH5_18(15-298)	GH5_e224	GH5_18	N	3
WP_121914040.1	3.2.1.23|3.2.1.31	GH2(38-960)	GH2_e104	GH2	N	3
WP_121914045.1	3.2.1.-	GH42(20-388)	GH42_e0	GH42	N	3
WP_121914086.1	3.2.1.177	GH31(274-721)	GH31_e31	GH31	N	3
WP_121914128.1	-	GT2(5-135)	GT2	GT2	N	3
WP_121914159.1	3.2.1.23	GH42(26-397)	GH42_e28	GH42	N	3
WP_121914168.1	N	CE1(192-429)	N	N	N	1
WP_121914179.1	-	GT4(204-343)	GT4_e207	GT4	N	3
WP_121914228.1	-	GT2(14-156)	GT2	GT2	N	3
WP_121914233.1	3.2.1.21|3.2.1.-|3.2.1.37|3.2.1.55|3.2.1.23|3.2.1.45	GH3(36-247)	GH3_e197	GH3	N	3
WP_121914331.1	-	GT2(8-165)	GT2	GT2	N	3
WP_121914338.1	-	GT2(180-339)+GT2(831-991)+GT2(1089-1209)	GT2+GT2+GT2+GT2	GT2	N	3
WP_121914339.1	-	GT2(9-128)	GT2	GT2	N	3
WP_121914385.1	3.2.1.84	GH31(230-670)	GH31_e37	GH31	N	3
WP_121914434.1	-	GT51(78-265)	GT51_e11	GT51	N	3
WP_121914435.1	-	GT2(12-178)	GT2	GT2	N	3
WP_121914571.1	-	GH109(17-172)	GH109_e7	N	N	2
WP_121914604.1	3.2.1.55	GH51(8-510)	GH51_e0	GH51	N	3
WP_121914624.1	-	GT2(48-211)	GT2	GT2	N	3
WP_121914625.1	-	GT83(106-505)	GT83_e68	N	N	2
WP_121914659.1	-	GT4(212-362)	GT4_e2883	GT4	N	3
WP_121914747.1	3.2.1.51	GH29(3-336)	GH29_e88	GH29	N	3
WP_121914785.1	-	GT4(199-352)	GT4_e3355	GT4	N	3
WP_121914841.1	3.2.1.55	GH51(11-507)	GH51_e0	GH51	N	3
WP_121914846.1	-	GH3(674-875)	GH3_e130	GH3	N	3
WP_121914847.1	3.2.1.21|3.2.1.-|3.2.1.37|3.2.1.55|3.2.1.23|3.2.1.45	GH3(26-244)	GH3_e197	GH3	N	3
WP_121914848.1	-	GT2(16-147)	GT2	GT2	N	3
WP_121914887.1	3.2.1.20	GH13_30(34-396)	GH13_e234	GH13_30	N	3
WP_121914892.1	3.2.1.21	GH1(6-386)	GH1_e38	GH1	N	3
WP_121914894.1	2.4.1.7	GH13_18(35-379)	GH13_e144	GH13_18	N	3
WP_121914897.1	3.2.1.55	GH43_22(497-740)	GH43_e135	GH43_22	Y(1-31)	3
WP_121914898.1	3.2.1.55	GH43_27(726-1068)	GH43_e116	GH43_27	Y(1-25)	3
WP_121914914.1	3.2.1.177	GH31(235-696)	GH31_e0	GH31	N	3
WP_121915057.1	-	GH36(62-598)	GH36_e14	GH36	N	3
WP_121915060.1	3.2.1.55	GH43_22(490-728)	GH43_e249	GH43_22	N	3
WP_183129691.1	2.4.1.15	GT20(5-253)+GT20(310-508)	GT20_e1	GT20	N	3
WP_183129694.1	-	GT39(60-359)	GT39_e1	GT39	N	3
WP_183129704.1	-	GT28(214-386)	GT28_e141	GT28	N	3
WP_121914013.1	-	N	CBM50_e252	N	N	1
WP_121914875.1	-	N	GH23_e314	GH23	Y(1-43)	2
WP_121914427.1	-	N	GH23_e447	GH23	N	2
WP_121914775.1	-	N	GT2	GT0	N	2
WP_121914842.1	3.2.1.-|-	N	GH39_e118+CBM35_e62	CBM0+GH39	Y(1-29)	2
WP_121913878.1	-	N	GH36_e69	GH36	N	2
WP_024626575.1	N	N	N	GH13	N	1
WP_024626877.1	N	N	N	GT58	N	1
WP_024627241.1	N	N	N	GH13_30	N	1
WP_024627326.1	N	N	N	GH13_31	N	1
WP_024627822.1	N	N	N	GT83	N	1
WP_029678349.1	N	N	N	GT47	N	1
WP_121913899.1	N	N	N	CBM50	N	1
WP_121913914.1	N	N	N	CBM50	N	1
WP_121914089.1	N	N	N	GT2	N	1
WP_121914096.1	N	N	N	CBM48+GH13_9	N	1
WP_121914148.1	N	N	N	CBM50+GH25	N	1
WP_121914197.1	N	N	N	GH38	N	1
WP_121914221.1	N	N	N	GT4	N	1
WP_121914440.1	N	N	N	GH16	N	1
WP_121914443.1	N	N	N	GH1	N	1
WP_121914542.1	N	N	N	GT2	N	1
WP_121914585.1	N	N	N	GH13_11	N	1
WP_121914596.1	N	N	N	GT4	N	1
WP_121914662.1	N	N	N	GH28	N	1
WP_121914699.1	N	N	N	GH28	N	1
WP_121914939.1	N	N	N	CBM50	N	1
WP_121914978.1	N	N	N	CE9	N	1
WP_121914991.1	N	N	N	GT4	N	1
WP_121915047.1	N	N	N	GH101	N	1

## Sheet: wkB338
dbCAN metaserver results for Bifidobacterium strain wkB338
Gene ID	EC#	HMMER	dbCAN_sub	DIAMOND	Signalp	#ofTools
WP_046323098.1	-	GT2(14-156)	GT2	GT2	N	3
WP_110425847.1	N	GH109(2-163)	N	N	N	1
WP_110425881.1	-	GT51(105-277)	GT51_e89	GT51	N	3
WP_121912542.1	-	GT2(12-178)	GT2	GT2	N	3
WP_121912544.1	-	GT51(78-265)	GT51_e11	GT51	N	3
WP_121912624.1	-	GT111(14-252)+GT8(280-551)	GT111_e16+GT8_e174	GT111+GT8	N	3
WP_121912626.1	-	GT2(5-146)+GT111(388-626)+GT8(659-928)	GT2+GT111_e16+GT8_e174	GT111+GT2+GT8	N	3
WP_121912678.1	3.2.1.21|3.2.1.-|3.2.1.37|3.2.1.55|3.2.1.23|3.2.1.45	GH3(36-247)	GH3_e197	GH3	N	3
WP_121912759.1	3.2.1.22	GH36(69-655)	GH36_e2	GH36	N	3
WP_121912768.1	-	GH3(697-885)	GH3_e130	GH3	N	3
WP_121912769.1	3.2.1.21|3.2.1.-|3.2.1.37|3.2.1.55|3.2.1.23|3.2.1.45	GH3(26-244)	GH3_e197	GH3	N	3
WP_121912770.1	-	GT2(16-147)	GT2	GT2	N	3
WP_121912826.1	3.2.1.40|3.1.1.73	GH78(315-829)	CBM67_e28+GH78_e80	GH78	N	3
WP_121912827.1	3.2.1.21	GH1(3-411)	GH1_e111	GH1	N	3
WP_121912830.1	-	GH42(30-407)	GH42_e33	GH42	N	3
WP_121912831.1	3.2.1.177	GH31(218-679)	GH31_e0	GH31	N	3
WP_121912845.1	2.4.1.7	GH13_18(35-379)	GH13_e144	GH13_18	N	3
WP_121912849.1	3.2.1.22	GH31(131-530)	GH31_e46	GH31	N	3
WP_121912862.1	-	GH2(6-795)	GH2_e79	GH2	N	3
WP_121912863.1	3.2.1.111|3.2.1.51	GH29(12-337)	GH29_e30	GH29	N	3
WP_121912865.1	3.2.1.24	GH38(254-509)	GH38_e38	GH38	N	3
WP_121912899.1	3.2.1.55	GH51(2-505)	GH51_e1	GH51	N	3
WP_121912953.1	-	GH115(21-942)	GH115_e3	GH115	N	3
WP_121913007.1	-	GH13(29-378)	GH13_e57	GH13_44	N	3
WP_121913022.1	3.2.1.51	GH29(25-389)	GH29_e53	GH29	N	3
WP_121913023.1	3.2.1.177	GH31(239-669)	GH31_e31	GH31	N	3
WP_121913024.1	3.2.1.4|3.2.1.-	GH5_4(46-327)	GH5_e215	GH5_4	N	3
WP_121913025.1	-	GH43_12(12-294)	GH43_e100	GH43_12	N	3
WP_121913026.1	3.2.1.23	GH42(13-386)	GH42_e29	GH42	N	3
WP_121913030.1	2.4.1.20|2.4.1.49	GH94(2-827)	GH94_e12	GH94	N	3
WP_121913032.1	3.2.1.21|3.2.1.-|3.2.1.38|3.2.1.23|3.2.1.74	GH1(8-477)	GH1_e113	GH1	N	3
WP_121913035.1	2.4.1.64	GH65(589-961)	GH65_e2	GH65	N	3
WP_121913039.1	-	GH43_22(64-300)	GH43_e200	GH43_22	N	3
WP_121913041.1	-	GH43_4(54-398)	GH43_e182	GH43_4	Y(1-40)	3
WP_121913042.1	3.2.1.55	GH43_27(366-699)	GH43_e116	GH43_27	N	3
WP_121913047.1	-	GH43_24(26-269)	GH43_e296	GH43_24	N	3
WP_121913048.1	3.2.1.37	GH43_22(61-296)	GH43_e201	GH43_22	N	3
WP_121913076.1	-	GH32(21-293)	GH32_e121	GH32	N	3
WP_121913078.1	-	GH43_26(4-304)	GH43_e175	GH43_26	N	3
WP_121913080.1	-	GH43_34(20-287)	GH43_e120	GH43_34	N	3
WP_121913118.1	-	GT4(198-351)	GT4_e3355	GT4	N	3
WP_121913152.1	3.2.1.23	GH42(26-397)	GH42_e28	GH42	N	3
WP_121913179.1	N	CE1(193-429)	N	N	N	1
WP_121913189.1	-	GT4(204-342)	GT4_e207	GT4	N	3
WP_121913238.1	3.2.1.26	GH32(41-348)	GH32_e28	GH32	N	3
WP_121913255.1	-	GH30_3(115-315)	GH30_e40	N	N	2
WP_121913257.1	3.2.1.21|3.2.1.-|3.2.1.37|3.2.1.55|3.2.1.23|3.2.1.45	GH3(32-251)	GH3_e197	GH3	N	3
WP_121913260.1	3.2.1.37	GH30_2(47-457)	GH30_e60	GH30_2	N	3
WP_121913269.1	3.2.1.185	GH127(18-610)	GH127_e0	GH127	N	3
WP_121913288.1	3.2.1.21	GH3(80-311)	GH3_e91	GH3	N	3
WP_121913307.1	3.2.1.55	GH51(6-510)	GH51_e0	GH51	N	3
WP_121913334.1	N	GH109(17-171)	N	N	N	1
WP_121913391.1	-	GT4(212-361)	GT4_e2883	GT4	N	3
WP_121913467.1	3.2.1.51	GH29(3-336)	GH29_e88	GH29	N	3
WP_121913475.1	3.2.1.55	GH51(11-510)	GH51_e0	GH51	N	3
WP_121913486.1	3.2.1.8|3.2.1.55|-	GH25(229-414)+CBM13(448-538)	GH25_e221+CBM13_e338	CBM13+GH25	Y(1-20)	3
WP_121913491.1	-	GT81(3-229)	GT2	GT2	N	3
WP_121913492.1	-	GT2(41-209)	GT2	GT2	N	3
WP_121913500.1	5.4.99.11|3.2.1.20|3.2.1.10|3.2.1.-|3.2.1.70	GH13_31(46-412)	GH13_e122	GH13_31	N	3
WP_121913502.1	3.2.1.22	GH36(18-687)	GH36_e2	GH36	N	3
WP_121913512.1	-	CE9(27-430)	CE9_e95	CE9	N	3
WP_121913525.1	3.2.1.172	GH105(32-360)	GH105_e52	GH105	N	3
WP_121913547.1	-	GT2(45-271)	GT2	GT2	N	3
WP_121913549.1	-	GT2(5-135)	GT2	GT2	N	3
WP_121913598.1	3.2.1.55	GH2(5-447)	GH2_e73	GH2	N	3
WP_121913624.1	3.2.1.31	GH30_9(30-471)	GH30_e3	GH30_9	N	3
WP_121913625.1	3.2.1.31	GH30_9(36-476)	GH30_e3	GH30_9	N	3
WP_121913626.1	3.2.1.40	CBM67(118-296)+GH78(325-841)	CBM67_e28+GH78_e12	GH78	N	3
WP_121913651.1	-	GH35(43-392)	GH35_e16	GH35	N	3
WP_121913697.1	3.2.1.23|3.2.1.31	GH2(38-969)	GH2_e104	GH2	N	3
WP_121913698.1	-	GH31(188-614)	GH31_e77	GH31	N	3
WP_121913699.1	3.2.1.25	GH5_18(15-298)	GH5_e224	GH5_18	N	3
WP_121913702.1	3.2.1.24	GH38(271-521)	GH38_e38	GH38	N	3
WP_121913703.1	3.2.1.24	GH38(276-526)	GH38_e38	GH38	N	3
WP_121913705.1	3.2.1.24	GH38(269-520)	GH38_e38	GH38	N	3
WP_121913706.1	-	GH4(2-178)	GH4_e15	GH4	N	3
WP_147438294.1	-	GH32(88-395)	GH32_e116	GH32	N	3
WP_183122188.1	3.2.1.185	GH146(25-558)	GH146_e0	GH146	N	3
WP_183122202.1	-	GH2(2-479)	GH2_e37	GH0	N	3
WP_183122225.1	-	GH43_4(385-731)	GH43_e182	GH43_4	Y(1-39)	3
WP_183122230.1	-	GT39(61-360)	GT39_e1	GT39	N	3
WP_183122231.1	-	GH27(148-416)	GH27_e1	GH27	N	3
WP_183122270.1	2.4.1.15	GT20(2-265)+GT20(321-520)	GT20_e1+GT20_e1	GT20	N	3
WP_183122292.1	3.2.1.52	GH20(147-461)	GH20_e24	GH20	N	3
WP_183122295.1	-	GT28(214-386)	GT28_e141	GT28	N	3
WP_183122306.1	N	GH109(6-160)	N	N	N	1
WP_220702270.1	-	GH146(195-711)	GH146_e8	GH146	N	3
WP_121913730.1	-	N	CBM50_e252	N	N	1
WP_121912552.1	-	N	GH23_e447	GH23	N	2
WP_046323022.1	-	N	GT2	GT0	N	2
WP_121912792.1	-	N	GH23_e314	GH23	N	2
WP_046323120.1	N	N	N	GH13	N	1
WP_046323140.1	N	N	N	GH38	N	1
WP_046323384.1	N	N	N	GT58	N	1
WP_110417070.1	N	N	N	GH13_11	N	1
WP_121912572.1	N	N	N	CE12	N	1
WP_121912625.1	N	N	N	GT4	N	1
WP_121912807.1	N	N	N	GT47	N	1
WP_121912860.1	N	N	N	CBM50	N	1
WP_121912908.1	N	N	N	CE9	N	1
WP_121912919.1	N	N	N	GT4	N	1
WP_121912981.1	N	N	N	GH101	N	1
WP_121913113.1	N	N	N	GH13_31	N	1
WP_121913142.1	N	N	N	CBM50+GH25	N	1
WP_121913314.1	N	N	N	GT4	N	1
WP_121913340.1	N	N	N	GT83	N	1
WP_121913360.1	N	N	N	GT2	N	1
WP_121913394.1	N	N	N	GH28	N	1
WP_121913431.1	N	N	N	GH28	N	1
WP_121913506.1	N	N	N	CBM50	N	1
WP_121913527.1	N	N	N	CBM50	N	1
WP_121913585.1	N	N	N	CBM48+GH13_9	N	1
WP_121913593.1	N	N	N	GT2	N	1
WP_121913721.1	N	N	N	GT28	N	1
WP_121913739.1	N	N	N	GH13_30	N	1
WP_121913780.1	N	N	N	GH1	N	1
WP_121913782.1	N	N	N	GH16	N	1
WP_220702250.1	N	N	N	GT1	N	1
