# Supplementary figures and images for: Host-microbiome metabolism of a plant toxin in bees
Source: eLife journal article supplement (doi:10.7554/elife.82595), 2022-12-06

**A**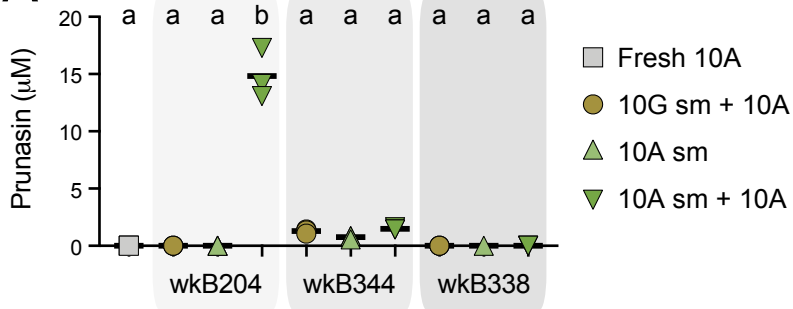**B**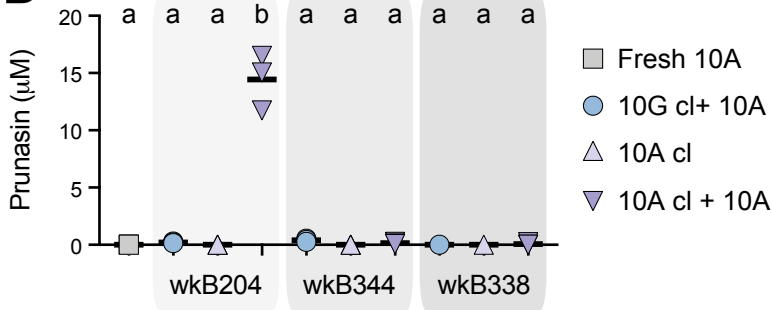

Supplement: supp [file elife-82595-supp-v1.zip]

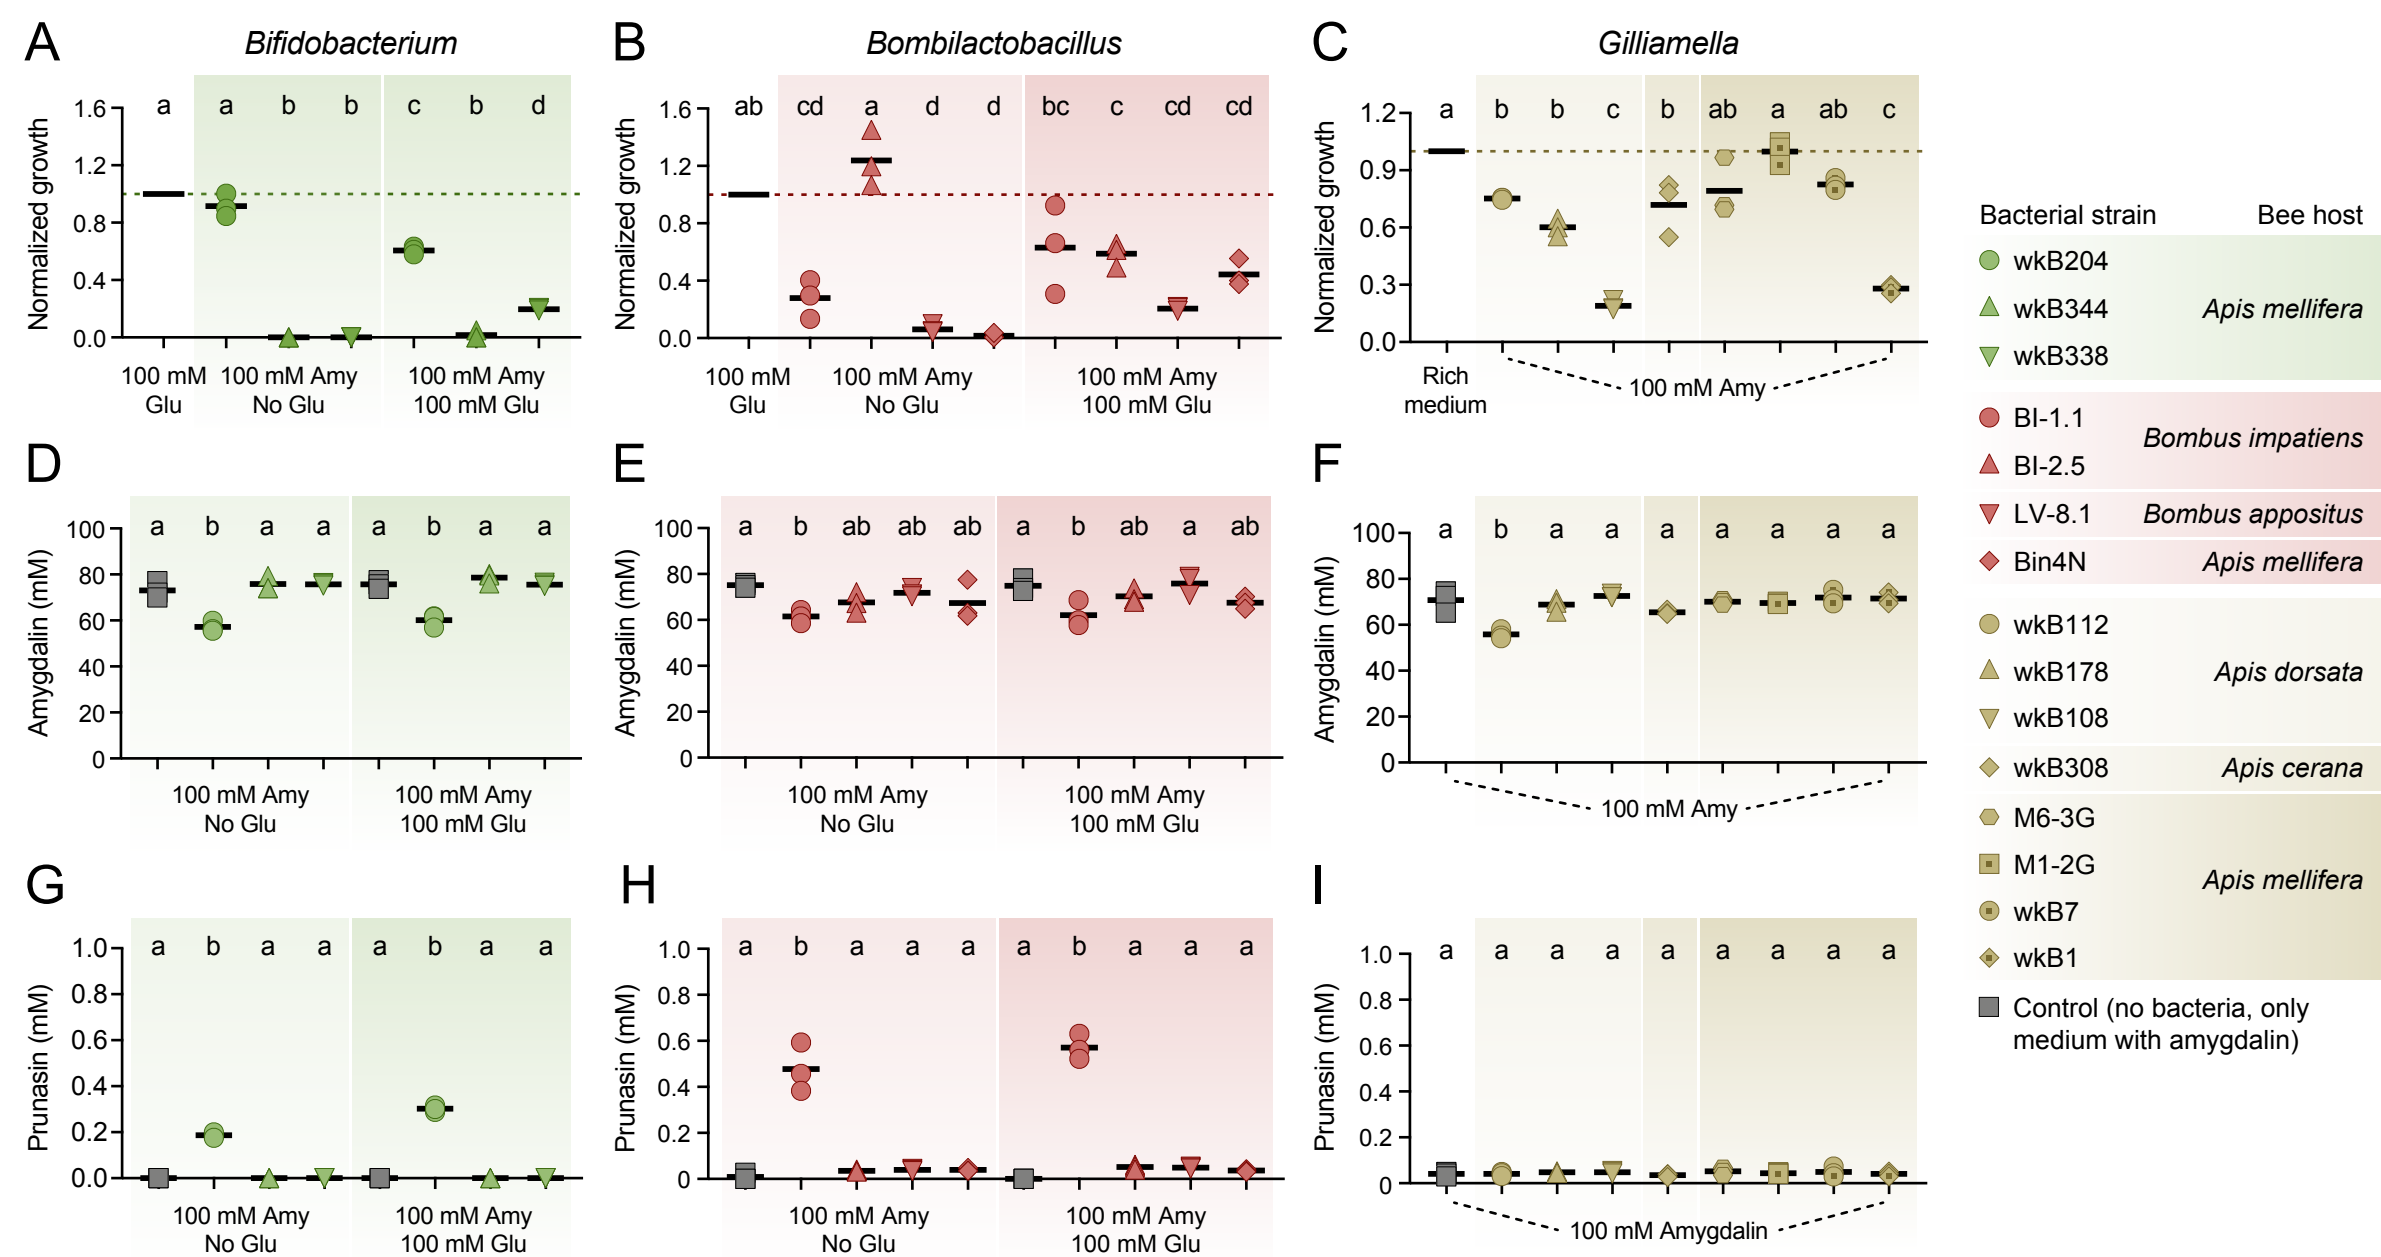

Supplement: supp [file elife-82595-supp-v1.zip]

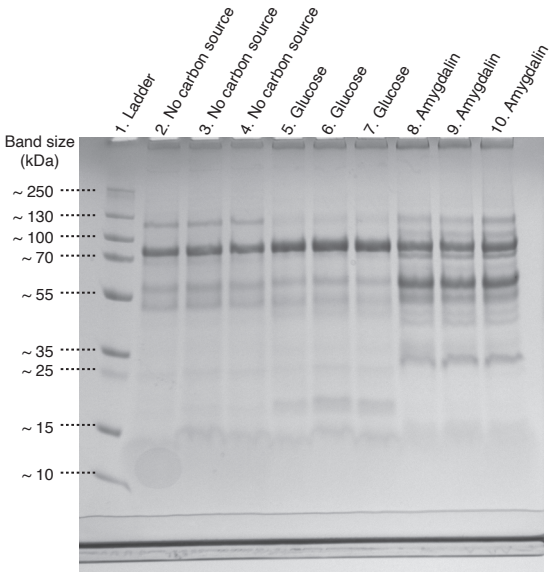

Supplement: supp [file elife-82595-supp-v1.zip]

**A****Microbiota-deprived bees**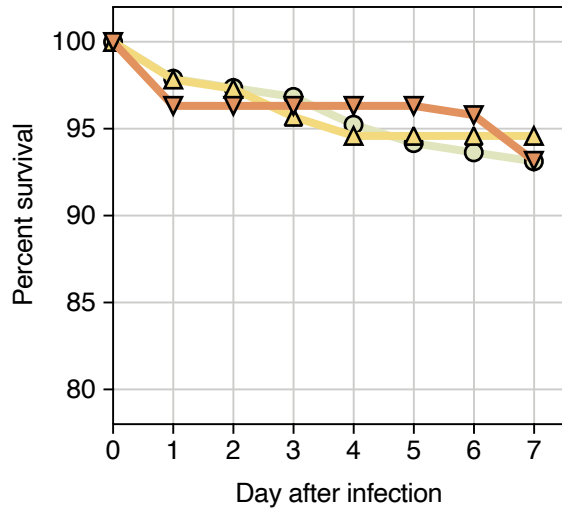**B****Microbiota-colonized bees**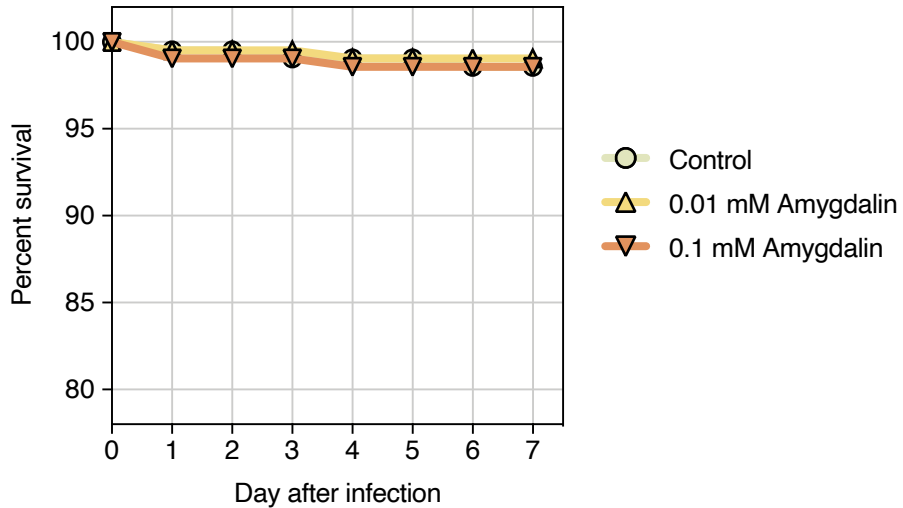

Supplement: supp [file elife-82595-supp-v1.zip]

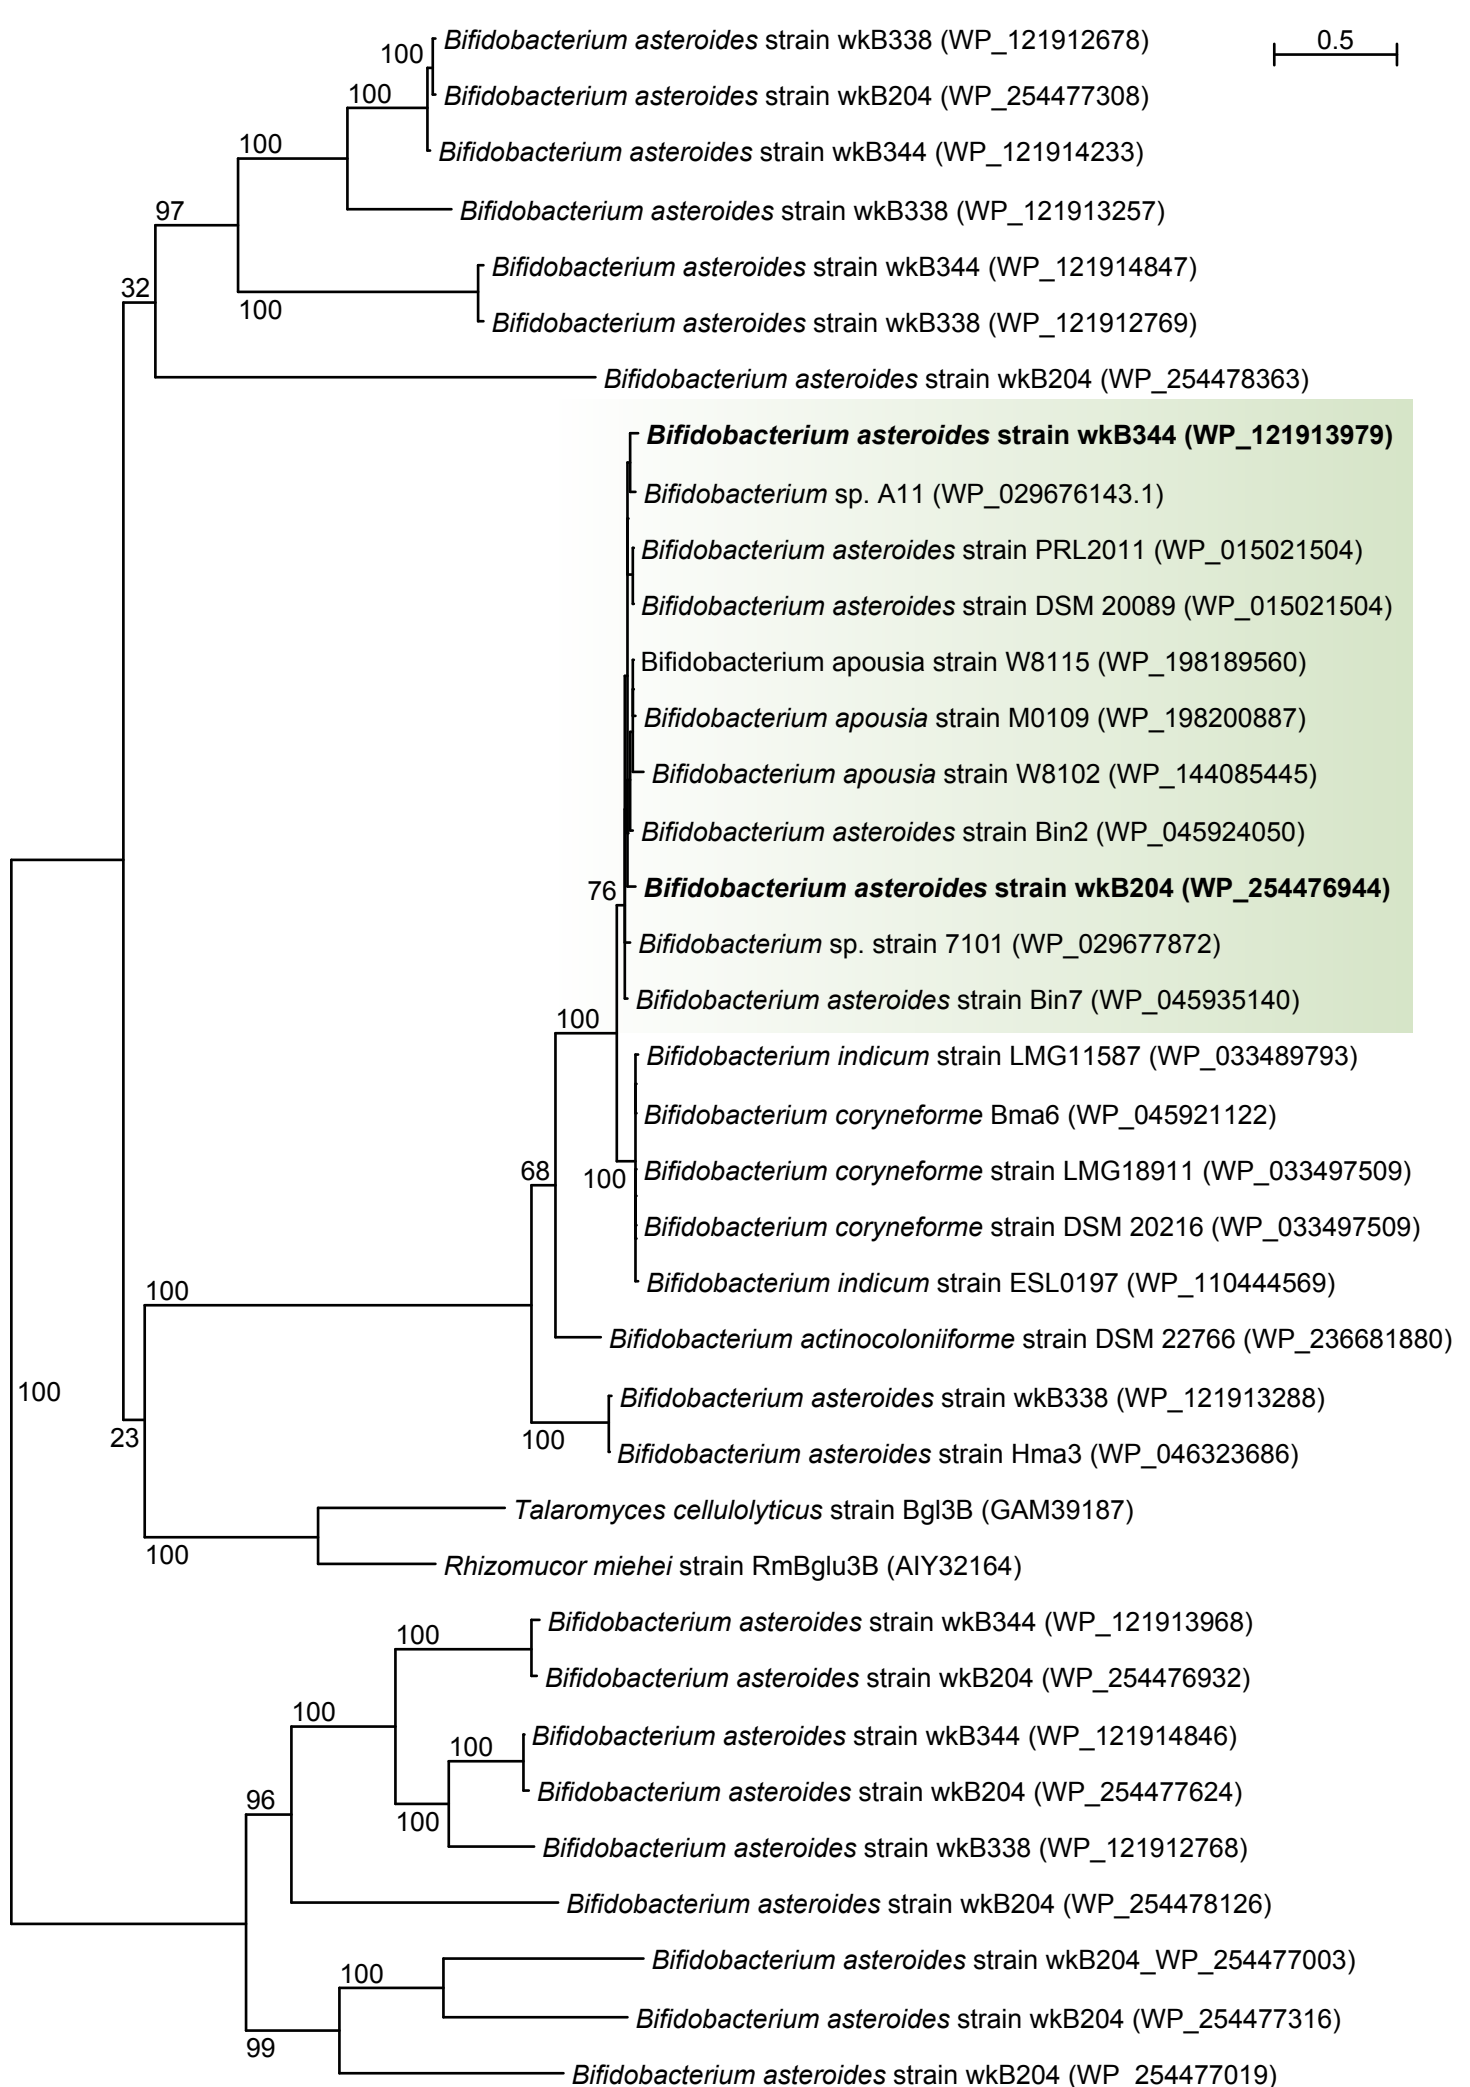

Supplement: supp [file elife-82595-supp-v1.zip]
